1 **Genomic contacts reveal the control of sister chromosome decatenation in *E. coli***

2 **Brenna Conin<sup>1,2,3</sup>, Ingrid Billault-Chaumartin<sup>1,4</sup>, Hafez El Sayyed<sup>1,5</sup>, Charlotte Cockram<sup>2,#</sup>, Romain**  
3 **Kozsul<sup>2,#</sup> and Olivier Espéli<sup>1,#</sup>**

4

5 <sup>1</sup> CIRB - Collège de France, CNRS UMR7241, INSERM U1050, PSL University, 11 place Marcelin  
6 Berthelot, 75005 Paris, France

7 <sup>2</sup> Institut Pasteur, Unité Régulation Spatiale des Génomes, CNRS UMR 3525, F-75015 Paris, France

8 <sup>3</sup> Sorbonne University, Collège doctoral

9 <sup>4</sup> Present address, Department of Fundamental Microbiology, University of Lausanne Quartier UNIL-  
10 Sorge, Biophore Building, CH-1015 Lausanne, SWITZERLAND

11 <sup>5</sup> Present address, University of Oxford, Biological Physics Research Unit, Clarendon Laboratory,  
12 Department of Physics, Oxford, OX1 3PU, United Kingdom

13 # for correspondence:

14 [charlotte.cockram@pasteur.fr](mailto:charlotte.cockram@pasteur.fr)

15 [romain.kozsul@pasteur.fr](mailto:romain.kozsul@pasteur.fr)

16 [olivier.espeli@college-de-france.fr](mailto:olivier.espeli@college-de-france.fr)

17

18 **Abstract**

19 In bacteria, chromosome segregation occurs progressively, from the origin to the terminus, a few  
20 minutes after the replication of each locus. In-between replication and segregation, sister loci are  
21 maintained in an apparent cohesive state by topological links. Whereas topoisomerase IV (Topo IV),  
22 the main bacteria decatenase, controls segregation, little is known regarding the influence of the  
23 cohesion step on chromosome folding. In this work, we investigated chromosome folding in cells with  
24 altered decatenation activities. Within minutes after Topo IV inactivation, a massive chromosome  
25 reorganization takes place, associated with increases in trans-contacts between catenated sister  
26 chromatids and in long-range cis-contacts between the terminus and distant loci on the genome. A  
27 genetic analysis of these signals allowed us to decipher specific roles for Topo IV and Topo III, an  
28 accessory decatenase. Moreover we revealed the role of MatP, the terminus macrodomain organizing  
29 system and MukB, the *E. coli* SMC in organizing sister chromatids tied by persistent catenation links .  
30 We propose that large-scale conformation changes observed in these conditions reveal a defective

31 decatenation hub located in the terminus area. Altogether, our findings support a model of spatial and  
32 temporal partition of the tasks required for sister chromosome segregation.

33

#### 34 **Introduction**

35 Prokaryotic and eukaryotic chromosomes are not randomly folded, but consist of well-defined  
36 structural entities with a complex hierarchical organization. The regulation of this network and its  
37 functional interplay with gene expression or other chromosomal metabolic processes such as DNA  
38 repair, replication and segregation have been actively investigated in a number of species (Wang and  
39 Rudner, 2014). Improvement in imaging techniques of living cells, as well as the development of  
40 genomic approaches such as chromosome conformation capture (3C/Hi-C; reviewed in Dekker et al.,  
41 2013) techniques have highlighted a mosaic of intertwined structural features including loops,  
42 domains, and compartments (Dame et al., 2020).

43 In bacteria, an important part of genome folding relies on the presence of free DNA supercoils.  
44 Independent supercoiling domains were first observed in the 1970's through a combination of  
45 molecular biology and electron microscopy approaches (Kavenoff and Bowen, 1976; Sinden and  
46 Pettijohn, 1981). These textbook pictures consist of a succession of large (~200 kb) DNA plectonemes,  
47 or microdomains, that are delimited by topological insulators. Genomic and recombination assays  
48 confirmed the existence of these microdomains, but found that they are likely smaller in size (10-50  
49 kb), delimited by stochastic barriers (Postow, 2004; Stein et al., 2005). These results suggest that  
50 microdomains are not static, and that their size and position can be modulated by DNA transactions  
51 such as transcription (Deng et al., 2005) or the binding of proteins to DNA (Leng et al., 2011). The  
52 democratization of 3C/Hi-C methodologies provided the opportunity to further assess the impact of  
53 DNA supercoiling on chromosome folding. To date, 3C/Hi-C data revealed the organization of large  
54 chromosomal features, such as the alignment of replication arms (Le et al., 2013; Marbouty et al.,  
55 2015; Wang et al., 2015), macrodomains (Lioy et al., 2018) or inter-chromosomal contacts (Val et al.,  
56 2016). At smaller scale, Hi-C contact maps of every bacterial genome studied to date display self-  
57 interacting domains (CIDs, 20-200kb), whose significance remain unclear (Böhm et al., 2020; Le et al.,  
58 2013; Lioy et al., 2018; Marbouty et al., 2015; Val et al., 2016; Wang et al., 2015). The boundaries in-  
59 between CIDs correlate with the presence of long, highly expressed genes, or genes coding membrane  
60 proteins (Le and Laub, 2016; Le et al., 2013; Lioy et al., 2018).

61 Simulations suggest that supercoils are able to organize bacterial genome because they would  
62 condense DNA and promote the disentanglement of topological domains (Holmes and Cozzarelli,  
63 2000). DNA supercoiling is under tight homeostatic control by topoisomerases. In *E. coli*,

64 Topoisomerase I (Topo I), Topoisomerase III (Topo III), DNA Gyrase and Topoisomerase IV (Topo IV)  
65 have all well characterized enzymatic activities (Champoux, 2001; Levine et al., 1998), but  
66 understanding the roles played by topoisomerases in chromosomal compaction, folding and  
67 organization is still a work in progress. DNA Gyrase, that promotes the formation of free supercoils, is  
68 the best candidate for regulation of chromosome organization through supercoiling. Hi-C analysis  
69 following gyrase inhibition was studied in *Caulobacter crescentus*, revealing modest changes in  
70 chromosome conformation with a slight decrease of 20- to 200-kb contacts that reduced the sharpness  
71 and positions of CID boundaries (Le et al., 2013). This observation agrees with recombination data  
72 showing that topoisomerase alterations reduce supercoiling domain's size (Staczek and Higgins, 1998).  
73 The contribution of other topoisomerases in establishing, maintaining, and regulating genome-wide  
74 DNA contacts has, so far, not been investigated.

75 The *E. coli* SMC complex MukBEF was shown to be linked to DNA supercoiling, with MukBEF defects  
76 being suppressed by Topo I mutation (Sawitzke and Austin, 2000). The suppression correlates with an  
77 excess of negative supercoiling promoted by DNA gyrase. In addition, Hi-C analysis of a MukB mutant  
78 showed an important loss of long-range contacts (Lioy et al., 2018a), suggesting that MukB promotes  
79 contacts between distant pairs of loci. One hypothesis is that MukB could promote DNA loops *in vivo*  
80 (Badrinarayanan et al., 2012; Baxter et al., 2019; Carter and Sjögren, 2012; Ruiten and Rowland, 2018).  
81 For instance, it is possible that MukB, organised in an axial core, extrudes plectonemic microdomains  
82 (Mäkelä and Sherratt, 2020). Interestingly, MukB interacts with ParC, the catalytic subunit of Topo IV.  
83 Their interaction changes the catalytic properties of Topo IV (Hayama and Marians, 2010; Li et al.,  
84 2010) and modulates its localization (Nicolas et al., 2014; Stracy et al., 2015). *In vitro* assays suggest  
85 that a MukB – Topo IV interaction promotes DNA compaction by forcing the intramolecular knotting  
86 activity of Topo IV (Kumar et al., 2017). Single molecule imaging reveals that a small portion of ParC  
87 molecules are associated with MukB in small clusters, (Stracy et al., 2015). The absence of MukB leads  
88 to a 2-fold reduction of Topo IV clusters, suggesting that MukB is a driver for the localization of Topo  
89 IV in the cell

90 Topo IV is the main bacterial decatenase. It catalyzes the elimination of precatenanes and catenanes  
91 formed during replication (Zechiedrich et al., 1997), and is essential for proper chromosome  
92 segregation (Joshi et al., 2013; Kato et al., 1990; Lesterlin et al., 2012; Wang et al., 2008) (Kato 1990).  
93 The requirement of PriA, the main replication fork restart protein, for the survival of Topo IV  
94 thermosensitive mutants (*parE<sup>ts</sup>* and *parC<sup>ts</sup>*), suggests that Topo IV inactivation increases replication  
95 fork stalling (Grompone et al., 2004). Nevertheless, chromosome replication in *parE<sup>ts</sup>* mutant cells  
96 occurs at a similar rate to that seen in *WT* cells (Wang et al., 2008). Topo IV activity is highest at the *dif*  
97 site positioned in the middle of the Terminus of replication macrodomain, presumably to solve

98 catenanes (El Sayyed et al., 2016; Hojgaard et al., 1999; Mercier et al., 2008). However, it also presents  
99 hundreds of putative activity sites dispersed on the genome, presumably used for the removal of  
100 precatenanes (El Sayyed et al., 2016).

101 Here we investigate, using Hi-C, the effect of the different topoisomerases on the *E. coli* chromosome  
102 conformation. The inactivation of Topo IV generates the most significant changes in the organization  
103 of the chromosome, with a pair of long-range contact patterns, hereafter called butterfly wings,  
104 expanding from the *terminus* macrodomain flanking regions. Imaging experiments confirmed the  
105 chromosome reorganization when Topo IV activity is reduced, suggesting that in these conditions  
106 distant sister loci segregate when they contact the terminus. Because MatP and MukB also influence  
107 the butterfly pattern, we propose that it reveals a particular genome folding dedicated to  
108 decatenation. We also showed that when Topo IV is deficient, Hi-C reveals inter-molecular contacts  
109 between sister chromosomes. Topo III limits these contacts suggesting that it eliminates an important  
110 part of precatenanes. Together, our results highlight the ability of Hi-C to unveil chromosomal  
111 topological features including inter-chromosomal contacts, to improve our understanding of the  
112 mechanisms governing chromosome segregation.

113

## 114 Results

### 115 Topo IV inactivation induces large-scale chromosome conformation changes in enterobacteria

116 To investigate the respective contribution of each topoisomerase to the genome-wide organization of  
117 bacteria chromosomes, we applied capture of chromosome conformation (Hi-C) (Cockram et al., 2021;  
118 Lieberman-Aiden et al., 2009; Material and Methods) to exponentially growing *Escherichia coli* cells  
119 either mutated or inactivated for each of the four topoisomerases. The ratio between *wt* and  
120 mutant/depleted cells contact maps were plotted (Material and Methods) (Lioy et al., 2018).

121 The inactivation of Topo IV using thermosensitive alleles of either the *parC* (*parC<sup>ts</sup>*) or *parE* (*parE<sup>ts</sup>*)  
122 subunits (Kato et al., 1990) resulted in significant changes in the global chromosomal architecture  
123 (**Figure 1A and 1B**). At the permissive temperature (30°C), the *parE<sup>ts</sup>* mutant grew similarly to *wt*, with  
124 no significant defects in cell growth nor changes in chromosome conformation (**Supplementary Figure**  
125 **1A and 1C**, respectively). Following a 1-hour shift to non-permissive temperature (42°C), we observed  
126 changes in mid- to long-range DNA contacts at three regions of the genome: First, an increase in short-  
127 to medium-range contacts from *oriC* to positions located at ~1 Mb and ~2 Mb on the right and left  
128 replichores, respectively. Second, a strong reduction of mid-range contacts in the terminus region  
129 (Coordinates 1,315 kb -1,830 Kb, **Figure 1A-B**) accompanied by an increase of very short-range (< 50kb,  
130 10 bins) contacts. This particular terminus pattern also featured a strong CID-like border around the  
131 *dif* site. Finally, a peculiar, butterfly-like signal, with two wings of long-range contacts emerges from  
132 the flanking regions of the Ter, and extending towards *oriC*.

133 These changes in chromosome folding are rescued by a plasmid expressing ParE into the *parE<sup>ts</sup>* mutant  
134 cells (**Supplementary Figure 1B-1D**). Although *parC<sup>ts</sup>* mutants are sicker, even at low temperatures  
135 (**Supplementary Figure 1A**), we observed a phenotype similar to that of *parE<sup>ts</sup>*, suggesting that the  
136 chromosomal changes observed in these mutants are associated with Topo IV inactivation (**Figure 1B**).  
137 To broaden these observations, we applied Hi-C to another  $\gamma$ -proteobacteria, *Salmonella typhimurium*  
138 for which thermosensitive Topo IV mutations are available (Luttinger et al., 1991; Springer and Schimid,  
139 1993). Similar conformation changes were observed (**Figure 1C and 1D**).

140 Depletion, deletion or inactivation of the three others *E. coli* topoisomerases (Topo I, Topo III and  
141 gyrase) had only mild effect on the global *E. coli* chromosome organization (**Supplementary Figure 1E,**  
142 **1F and 1G**). To reduce Topo I activity we used the *topA31* allele (Conter et al., 1997), a *topB* deletion  
143 mutant was used to study Topo III (DiGate and Marians, 1989), and DNA gyrase was studied using a  
144 thermosensitive mutant of *gyrB* (Orr and Staudenbauer, 1981). We observed that although alterations  
145 in Topo I and Topo III resulted in a slight loss or gain in short-range contacts, no other significant

146 changes in the chromosome conformation of these cells were detected (**Supplementary Figure 1E and**  
 147 **1F**).

148

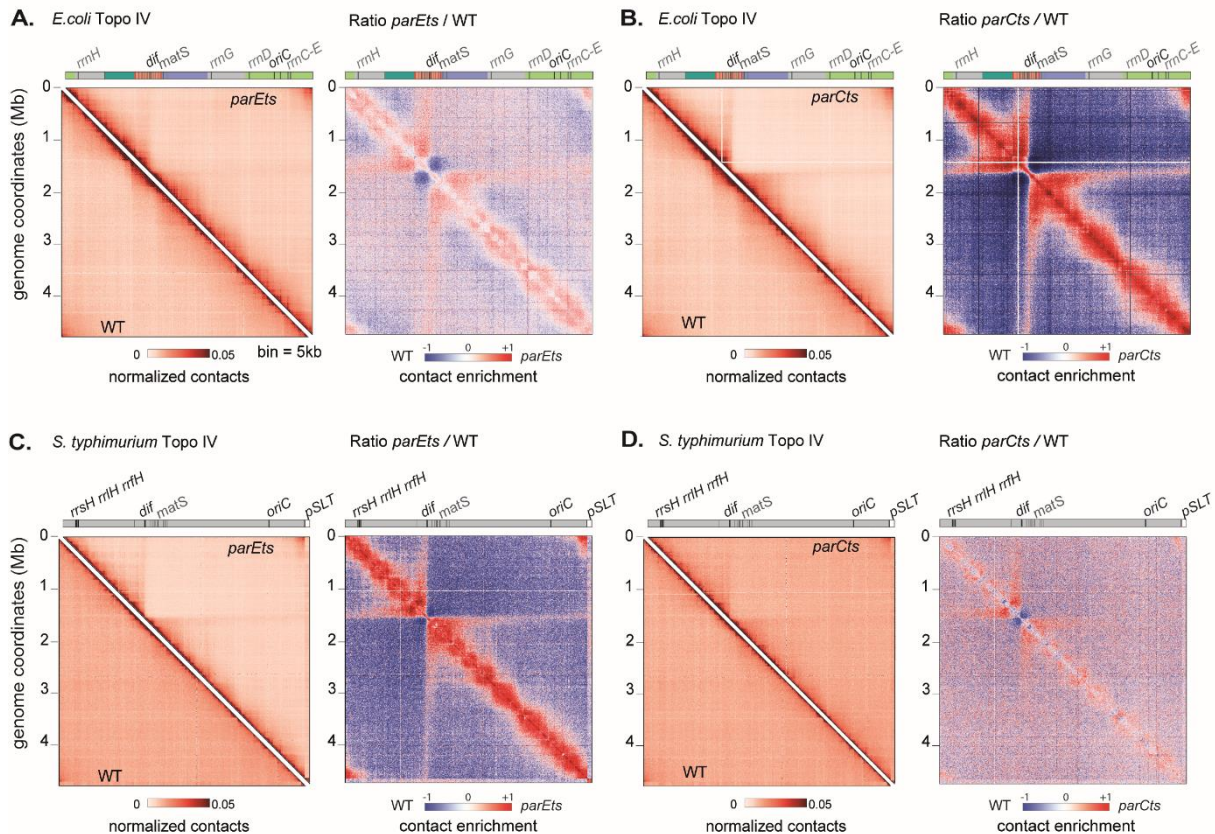

149

150 **Figure 1: Impact of Topoisomerase IV alteration on nucleoid organization of *E. coli* and *S.***  
 151 ***typhimurium***

152 For each panels, symmetric halves of the normalized contact map binned at 5kb with the wild type (WT)  
 153 on the bottom and the altered topoisomerase on the top, and the corresponding ratio matrix. (A) *parE*<sup>ts</sup>  
 154 after 60min of shift to non-permissive temperature (42°C) in *E. coli*, (B) *parC*<sup>ts</sup> grown at 30°C in *E. coli*,  
 155 (C) *parE*<sup>ts</sup> after 60min of shift to non-permissive temperature (42°C) in *S. typhimurium*, (D) *parC*<sup>ts</sup> after  
 156 60min of shift to non-permissive temperature (42°C) in *S. typhimurium*. Genome coordinates are  
 157 indicated by the x and y axes. Interesting positions of the genome are indicated above the plot. *matS*  
 158 sites are represented as grey bars. For *E. coli*, macrodomains are represented by light green (*ori*), dark  
 159 green (right), red (*ter*), blue (left), gray (NR/NL). For the normalized contact maps, the color scale of the  
 160 frequency of contacts between two regions of the genome is indicated below (arbitrary units), from  
 161 white (rare contacts) to dark red (frequent contacts). For the ratio matrices, a decrease or increase in  
 162 contacts in the mutant cells compared with the control is represented with a blue or red color,  
 163 respectively. White indicates no differences between the two conditions.

164

165 Since gyrase inhibition blocks DNA replication and results in a significant remodeling of the  
 166 transcriptome (Orr and Staudenbauer, 1981; Peter et al., 2004), *gyrB*<sup>ts</sup> mutant cells were only shifted  
 167 to the non-permissive temperature for a brief (20 min) period. Cells exhibit an altered chromosomal

168 organization compared to *WT* cells growing at the same temperature (**Supplementary Figure 1G**).  
169 Inhibition of Gyrase activity resulted in a decrease of short-range contacts. These observations agree  
170 with the involvement of gyrase in the definition of supercoiling microdomains or CIDs (Le et al., 2013).

171 **Hi-C features observed in *parE<sup>ts</sup>* mutant cells are concomitant with a large reorganization of the**  
172 **nucleoid**

173 Imaging further supported that nucleoid organization and compaction undergoes a progressive change  
174 following *parE<sup>ts</sup>* inactivation. Following the 42°C shift, the average DAPI staining density roughly  
175 doubled compared to *wt* (**Figure 2A-B**). Using *parS* pMT1 tags in the *oriC* and *terminus* region, we  
176 analyzed the segregation of sister foci after replication (**Figure 2C**). In agreement with earlier  
177 publications (Wang et al., 2015), we observed a reduction in foci number after 40 min at non-  
178 permissive temperature, suggesting that the increase in nucleoid compaction correlates with the  
179 blockage of sister chromatid segregation. In addition, we observed a strong change in the localization  
180 of *oriC* and *ter* foci within the cell (**Figure 2D and 2E and Supplementary Figure 2A and 2B**). At  
181 permissive temperature, *oriC* positions preferentially towards the nucleoid edges whereas the *ter*  
182 positions closer to the center of the nucleoid. Upon shift to non-permissive temperature, this  
183 organization is flipped, with the *ter* and *oriC* migrating towards the cell pole and mid-cell, respectively.  
184 These observations suggest that Topo IV inactivation affects both sister chromosome segregation and  
185 nucleoid organization.

186 We then performed a kinetic analysis, using Hi-C, of chromosome folding after Topo IV inactivation. It  
187 allowed us to evaluate whether nucleoid conformation changes correlate with the apparition of new  
188 contacts in the Hi-C maps (**Figure 2F and Supplementary Figure 2C**). The first consequence of Topo IV  
189 inactivation was an immediate loss of short-range contacts over the entire genome (**Figure 2F, T10**).  
190 This drop was gradually substituted by an increase in short- to mid-range contacts, which becomes  
191 prevalent along chromosome arms after 40 minutes. Concomitantly the butterfly wings expanded  
192 from positions 1Mb and 2Mb. These features correlated with the evolution of the nucleoid density and  
193 organization over the same time period. The *terminus* region behaved differently, showing a persistent  
194 lack of short-range interactions over the entire kinetics. We could not determine whether this terminus  
195 pattern was a cause or a consequence of its localization at the nucleoid periphery (**Figure 2E**). After  
196 two hours (t120), we observed similar features with an overall increase of the differences with the *wt*  
197 (**Supplementary Figure 2D-G**). Altogether, these time course experiments show that specific contacts  
198 accumulate at discrete positions surrounding the *ter* domain upon inactivation of Topo IV, and  
199 therefore that Topo IV plays a role in suppressing the formation of long-range contacts within or  
200 between sister chromosomes.

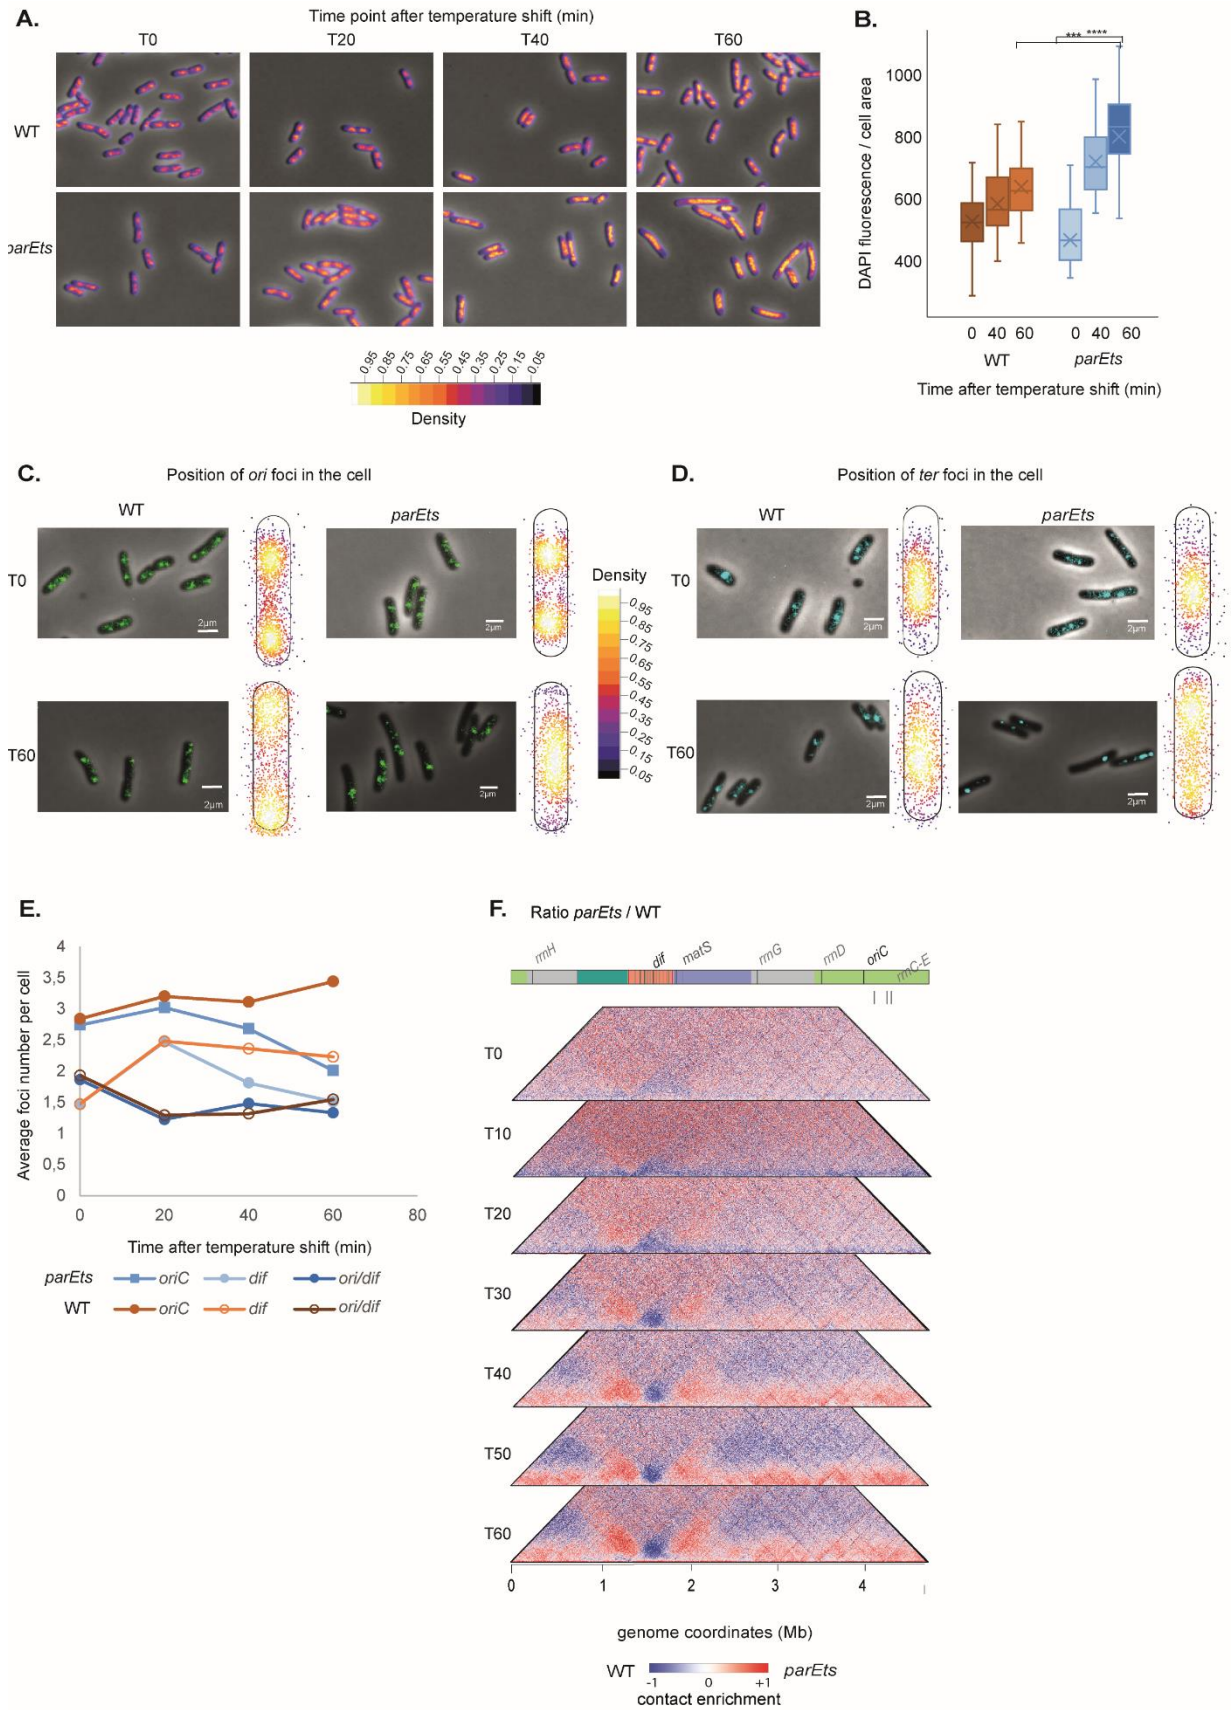



202 **Figure 2: Hi-C features observed in *parE<sup>ts</sup>* mutant cells are concomitant with a large reorganization**  
203 **of the nucleoid.**

204 (A) Merged images of phase contrast and DAPI signal (DIC signal in grey and the density of the DNA  
205 signal is represented with a fire color scale) of WT (left) and *parE<sup>ts</sup>* (right) cells every 20min during a  
206 temperature shift. Scale bar = 2  $\mu$ m. (B) Quantification of the fluorescence density as proxy for DNA  
207 density across time of the WT (brown boxes) and *parE<sup>ts</sup>* (blue boxes) (a Student test, \*\*\*  $P < 0.0005$ ). (C-  
208 D) Merged images of phase contrast and GFP signal, and average position of the foci in WT (left) and  
209 *parE<sup>ts</sup>* (right) cells before temperature shift (T0) and after 60min shift (T60). In (C), GFP signal reveals  
210 the position of *aidB parS T1* locus (*ori*) in the cells. In (D), GFP signal reveals the position of *far parS T1*  
211 (*ter*) in the cells. Dots represents each detected focus ( $n=200$ ) and the color scale represents the density  
212 of detected foci in the cell from black (0.05) to white (1). Intermediate time analysis can be found in  
213 Supplementary Figure 2A and 2B. (E) Quantification of the number of *ori* and *ter* foci across the time  
214 course as a proxy for sister chromatids cohesion, and of the ratio *ori/ter* for WT (brown lines) and *parE<sup>ts</sup>*  
215 (blue lines) (F) Kinetics of the impact of Topo IV alteration with a time point every 10min after shift at  
216 non permissive temperature from  $t_0$  to  $t_{60}$  represented by the ratio matrices of *parE<sup>ts</sup>* cells versus WT  
217 cells kinetics. Normalized contact map of each time point and  $t_{120}$  can be found in Supplementary  
218 Figure 2C-F. *matS* sites are represented as gray bars. Macrod domains are represented by light green  
219 (*ori*), dark green (right), red (*ter*), blue (left), gray (NR/NL). The y axis indicates the genomic coordinates  
220 (Mb). A decrease or increase in contacts in the mutant cells compared with the control is represented  
221 with a blue or red colour, respectively. White indicates no differences between the two conditions.

222

223

224 **The absence of Topo IV activity results in the co-localization of distant loci with the terminus of the**  
225 **chromosome**

226 We characterized further the two butterfly-wing stripes emanating at a 45° angle from the edges of  
227 the *terminus* region in the ratio contact maps between Topo IV and *wt* (**Figure 3A** coordinates 1.3 -  
228 1.5 Mb and 1.5 - 1.8Mb, respectively). These signals correspond to an enrichment in medium and long-  
229 range contacts by ~200 kb regions that in one direction span all the way up to *oriC*, while on the other  
230 direction, are blocked by *dif*, which represents a barrier preventing contacts across each halves of the  
231 *terminus* (**Figure 3A and B**). Using a 4C-like plot, we investigated how specific 5kb bins contribute to  
232 the butterfly signal (**Figure 3C and D**). As illustrated for two representative regions (position 3,010 and  
233 4,440 Kb), a small ( $\approx 1.5$  fold), but significant, contact enrichment with the *dif* zone was detected  
234 several megabases away from *dif*. This enrichment involved several (3 to 10) bins positioned a few tens  
235 of kb away from *dif*. The contacts between the *dif* zone and the 3,010 kb or 4,440 kb regions present  
236 a comparable frequency, suggesting that they do not obey to genomic distance law. We observed, on  
237 zoomed panels, that the bin containing *dif* (green dot on Figure 3D) was not involved in the butterfly  
238 wing contacts (**Figure 3D**). To test this exclusion of *dif*, we measured the sum of contacts made by a  
239 100 kb window 2Mb away from *dif* ( $\Sigma$  sign of **Figure 3A**) with the 1.2Mb region containing *dif* (**Figure**  
240 **3E**). This window displayed enriched contacts with most bins from the *terminus* region over 200 kb

241 surrounding *dif*, but not with *dif* itself. Their distance independent frequency and the lack of  
242 asymmetry at *dif* strongly suggests that butterfly wings correspond to long-range 3D contacts rather  
243 than slithering events.

244 To confirmed the propagation of these very long-range contacts at the single cell level, the inter-focal  
245 distances between fluorescently labelled loci positioned at *ori* and were measured in cells carrying the  
246 *parC<sup>ts</sup>* allele (**Figure 3F-I**), that displayed butterfly wings at low temperature (30°C) (**Figure 1C**). In these  
247 conditions, the *ori* (*aidB*, 4.4Mb) and the *ter* (*gusC*, 1.69Mb) loci colocalized at the center of the cell in  
248 approximately 8% of cells, a proportion significantly higher than for the *wt* (**Figure 3G**). The  
249 accumulation of the *ori* region at the center of the cell agrees with the global nucleoid rearrangement  
250 observed upon Topo IV inactivation (**Figure 2**). Ori-ter colocalization was observed close to mid-cell,  
251 while most *ter* foci were localized near the pole of the nucleoid (**Figures 2D and 3H**). Interestingly, the  
252 closest distances between sister *ori* foci were also observed close to mid-cell in the *parC<sup>ts</sup>* strain (**Figure**  
253 **3I**). This was in sharp contrast with *wt* where the minimal distance between sister *ori* foci was typically  
254 observed at the  $\frac{1}{4}$  and  $\frac{3}{4}$  positions. This observation suggests that when Topo IV is inactivated, the  
255 release of *ori* pairing takes place closer to mid-cell. Imaging therefore confirms the existence of  
256 occasional long-range contacts between the *terminus* and distant regions of the chromosome in  
257 absence of Topo IV activity, and suggests that these contacts may correspond to sister loci segregation  
258 attempts. The detection of rare *ori-ter* colocalization events in *wt* cells (**Figure 3G**) suggests that the  
259 peculiar chromosome folding events detected in the absence of Topo IV activity might also exist in  
260 some *wt* cells.

261

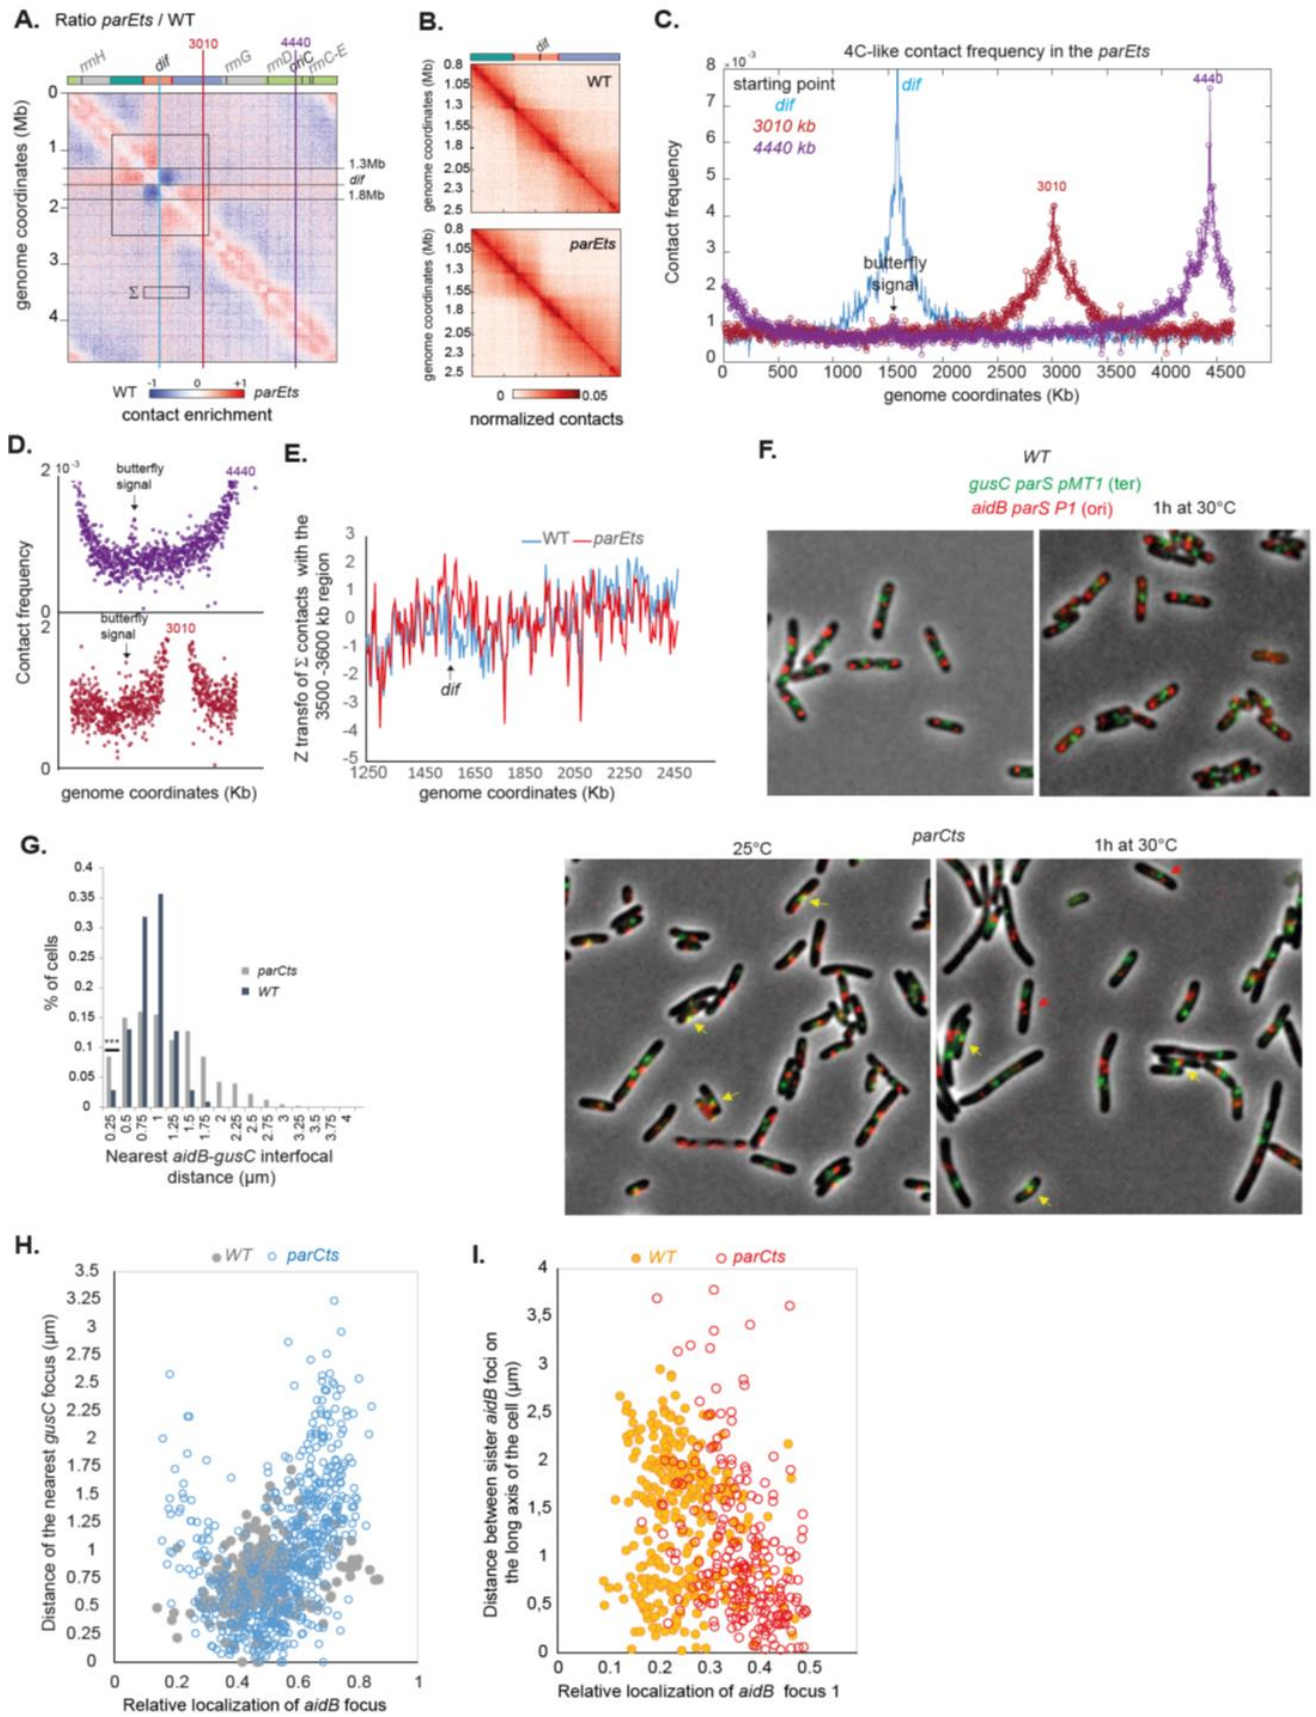

262

263

264 **Figure 3: Characterization of the butterfly wings pattern**

265 (A) Ratio of the normalized contact map of *parE<sup>ts</sup>* and WT where the butterfly wings borders are  
266 indicated by gray lines (1.3Mb – *dif* and *dif* - 1.8Mb) and two representative zones at 3301kb (red) and  
267 4440kb (purple). (B) Zoom on the terminus macrodomain of the WT and *parE<sup>ts</sup>* matrices from 0.8Mb to  
268 2.5Mb (C) 4C-like plot of contacts from the *dif*, the 3010Kb and 4440 Kb positions, (D) Rescaling of the  
269 plot C to show the butterfly wing contacts in the *dif* area. (E) Z transformation of the contacts made by  
270 a 100 Kb region located between the coordinates 3500 Kb and 3600 Kb (marked  $\Sigma$  in A) with the  
271 terminal part of the genome (coordinates 1250 - 2450 Kb). WT and *parE<sup>ts</sup>* normalized matrix were  
272 analyzed. (F) Merged images of phase contrast, CFP and Y-GFP signal. Y-GFP signal reveals the position  
273 of *gusC parS pMT1 (ter)* in the cells and CFP signal reveals the position of *aidB parS P1 locus (ori)* in the  
274 WT (left) and *parC<sup>ts</sup>* cells (right) at permissive temperature (25°C) and after 1h at non permissive  
275 temperature (30°C). Yellow arrows indicate colocalisation between *aidB* and *gusC* foci and red arrows  
276 indicate close sister *aidB* foci at the center of the cells. Scale bars are 4  $\mu$ m. (G) Distribution of the  
277 nearest interfocal distance between *ter* and *ori* foci in the WT and *parC<sup>ts</sup>* strain after 1h at 30°C. (N=  
278 600; colocalization = IFD <250nm) was analyzed with a KS test, \*\*\*  $P < 10^{-9}$ ). (H) Analysis of nearest  
279 interfocal distance between *ter* and *ori* foci as a function of the relative localization of the *ori* focus  
280 after 1h at 30°C. (I) Analysis of the distance between sister *ori* foci as a function of the position of the  
281 closest *ori* focus to the pole after 1h at 30°C.

282

283 ***parE<sup>ts</sup>* inactivation increase inter-chromosomal contacts**

284 The ability of conventional Hi-C to capture intra-chromosomal (*cis*) contacts is well established.  
285 However, its ability to reveal *trans* contacts between sister-chromatids remains limited given the  
286 difficulty to distinguish both homologous molecules without incorporation of modified bases (Oomen  
287 et al., 2020). Since Topo IV is mainly known for its involvement in the removal of inter-chromosomal  
288 links (or catenanes), presumably between allelic (or near-allelic) loci, we sought to test whether the  
289 emergence of prominent Hi-C signals spanning throughout the *parE<sup>ts</sup>* contact map could result from  
290 *trans* contacts. We therefore sought to distinguish the contribution of intra vs. inter-molecular  
291 contacts to these patterns by determining the impact of DNA replication in absence of Topo IV activity.  
292 To do this, we blocked replication initiation by treating WT and *parE<sup>ts</sup>* cells with the amino acid analog  
293 dl-serine hydroxamate (Ferullo et al., 2009) (Figure 4A). Following treatment, the cells were then  
294 shifted to 42°C for 1 hour. Hi-C ratio maps of replicating vs. non-replicating *wt* cells revealed a  
295 significant decrease in mid-range contacts along the entire chromosome in the absence of replication  
296 (Figure 4B). Non-replicating *parE<sup>ts</sup>* cells did not show the characteristic pattern observed for replicating  
297 cells (Figure 4C and Supplementary Figure 3A-B). Since the stringent response mediated by SHX also  
298 reduces transcription of many genes (Sharma and Chatterji, 2010), we tested whether absence of the  
299 characteristic pattern in SHX-treated cells could result from a poor transcription. Asynchronously  
300 growing *parE<sup>ts</sup>* and WT cells were therefore treated with the antibiotic rifampicin to inhibit  
301 transcription (STAR Methods). Although rifampicin alters Hi-C matrices' quality (Le et al., 2013), the  
302 partition of the chromosome into 3 regions in *parE<sup>ts</sup>* cells remained visible upon inactivation of Topo

303 IV at 42°C (i.e. the butterfly wings, a higher mid-range contacts in the *oriC* proximal region, and lower  
 304 mid-range contacts in the *ter*) (**Supplementary Figure 3C and 3D**). Taken together, these results  
 305 suggest that Topo IV inactivation only induces characteristic Hi-C patterns in replicating cells,  
 306 presumably because they correspond to inter-chromosome contacts.

307

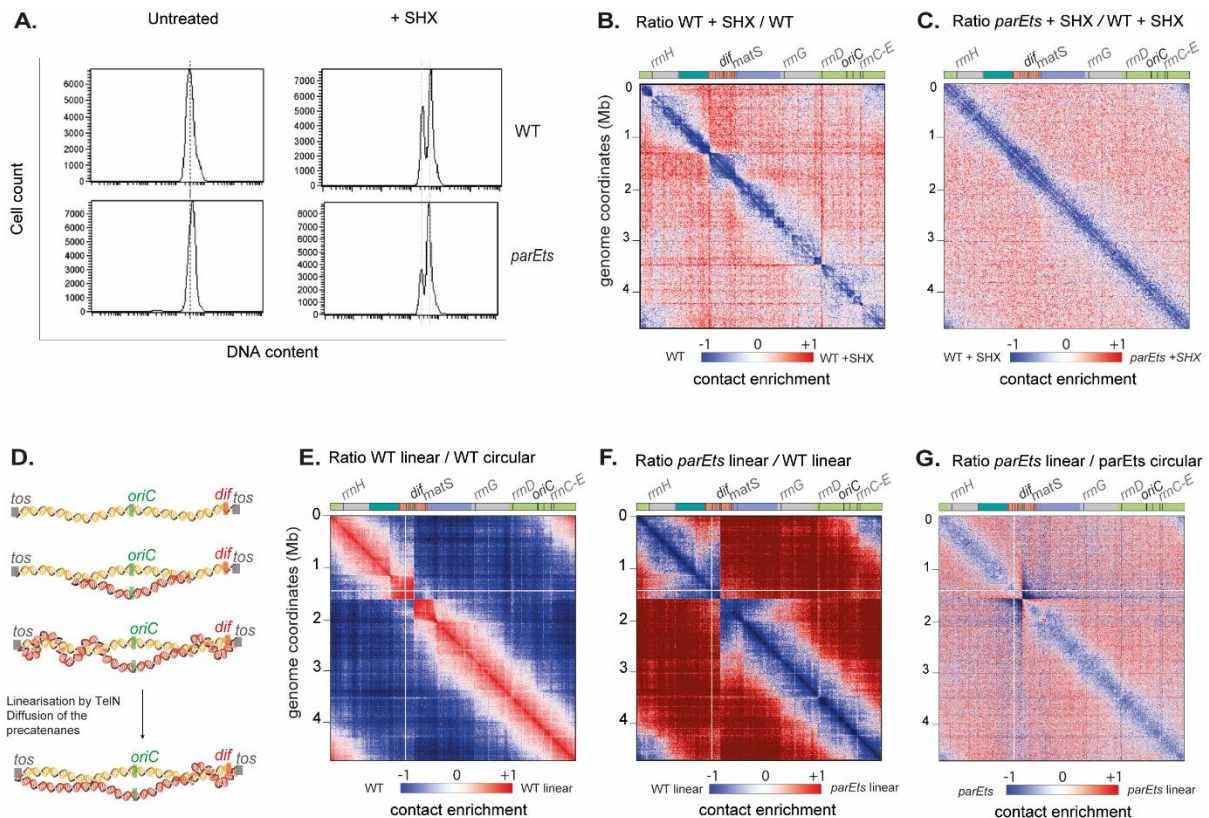

308

309 **Figure 4: Hi-C features resulting from *parEts* alteration result from sister chromosome interactions**

310 (A) FACS of WT and *parEts* cells after 60 min of shift at 42°C untreated (left) and treated with 10mg/ml  
 311 of SHX for 90min total (right). Nucleoid were stained with propidium iodide. Ratio of normalized  
 312 contacts map binned at 5kb of (B) WT + SHX compared to WT, (C) *parEts* + SHX compared to WT + SHX.  
 313 (D) Graphic representation of the replication in *E. coli* linear strain. The chromosome is linearized via  
 314 the *tos* / *TelN* system of the phage N15. *tos* sites (gray box) were inserted in the terminus macrodomain.  
 315 The replication starts at the *oriC* site (green box) and progress in a bidirectional manner toward the *dif*  
 316 site (red box). We hypothesis that precatenanes are formed during the replication of the linear  
 317 chromosome in the same manner as in the circular one. Sister chromatids are represented by double  
 318 helices in red (sister A) and yellow (sister B). Before chromosome segregation, the protelomerase *TelN*  
 319 linearize the sister chromosomes at the *tos* site which could possibly allow for diffusion and resolution  
 320 of the majority of the precatenanes. Ratio of normalized contacts map binned at 5kb of (E) linear WT  
 321 vs circular WT, (F) linear *parEts* vs linear WT, and (G) linear *parEts* linear vs *parEts* circular. Macrodomains  
 322 and interesting positions of the genome are indicated above the plot akin to Figure 1. The y axis  
 323 indicates the genomic coordinates. A decrease or increase in contacts in the mutant cells compared  
 324 with the control is represented with a blue or red colour, respectively. White indicates no differences  
 325 between the two conditions.

326

## 327 **Butterfly wings signals are linked to chromosome topology**

328 We then wondered whether the circular nature of the *E. coli* chromosome could lead to topological  
329 constraints on the *terminus* region that would translate into specific contact patterns in the absence  
330 of Topo IV. To test this, we performed Hi-C experiments in strains carrying a genome linearized at a *tos*  
331 site, inserted near *dif*, thanks to the bacteriophage N15 telomerase (Cui et al., 2007). In this strain,  
332 Topo IV is still required for growth (Cui et al., 2007). However, it is no longer active at *dif*, and the  
333 filamentation phenotype of the *matP* mutant is now rescued (El Sayyed et al., 2016). These  
334 observations hinted that topological tension resulting from Topo IV inactivation freely diffuses when  
335 the N15 telomerase linearizes the duplicated chromosome (**Figure 4D**). In the wt strain, linearization  
336 of the chromosome near *dif* resulted in an important redistribution of long-range contacts towards  
337 short and mid-range contacts (**Figure 4E and Supplementary Figure 3E**). Upon inactivation of *parE<sup>ts</sup>*,  
338 the Hi-C contact maps of the linear chromosome displayed a significant loss of short- to mid-range  
339 contacts, no butterfly wings and no *terminus* pattern compared to circular *wt* chromosomes (**Figure**  
340 **4F and Supplementary Figure 3F**). The comparison between *parE<sup>ts</sup>* strains carrying either a linear or a  
341 circular genome further revealed a decrease in short/medium contacts along linear chromosomes, in  
342 sharp contrast to *wt* conditions, and compatible with a reduction in the number or density of  
343 precatenation links (**Figure 4G**). This suggests that the linearization of the strain suppresses the  
344 accumulation of interminglements between the sister chromatids. Altogether, these observations  
345 strongly support the hypothesis that the enhanced mid-range contacts along chromosome arms, as  
346 well as the butterfly wings signals, form in response to a failure of Topo IV to remove inter-  
347 chromosomal links.

348

## 349 **Topo III activity partially rescues Topo IV deficiencies on chromosome conformation**

350 Topo III (*topB*) is a type I topoisomerase whose role during the normal cell cycle remains unclear. Both  
351 the modest chromosome conformation changes (**Supplementary Figure 1F**) and normal viability  
352 observed in the mutant (**Figure 5A**) confirmed that in laboratory growth conditions its role is limited.  
353 However, part of its activity is revealed when Topo IV is impaired, as Topo III overexpression rescues  
354 *parE<sup>ts</sup>* growth defects (Lee et al., 2019; Nurse et al., 2003; **Figure 5A**), whereas *topB* deletion reduces  
355 the viability of *parE<sup>ts</sup>* strains (**Figure 5A**). When *parE<sup>ts</sup>* was inactivated in a *topB* deletion strain, the Hi-  
356 C pattern observed in *parE<sup>ts</sup>* mutant cells at the non-permissive temperature was strengthened (**Figure**  
357 **5B**), with mid-range contacts increase, and stronger butterfly and *terminus* patterns (**Figure 5B**). In  
358 the *topB parE<sup>ts</sup>* strain, long-range contacts were observed between distant regions and a large central  
359 region of the *ter* macrodomain (**Figure 5C**). Their frequency was higher (**Figure 5C**) compared to the

360 single *parE<sup>ts</sup>* strain (**Figure 3C**). As observed for the *parE<sup>ts</sup>* strain the *dif* bin appeared to make less long-  
361 range contacts than its neighbors (**Figure 5C**). Interestingly, *parE<sup>ts</sup>* features were visible in the contact  
362 maps at 30°C in the absence of Topo III (**Supplementary Figure 4A**), suggesting that at this temperature  
363 Topo IV is already partially inactivated, but that the organization defects are suppressed by Topo III.  
364 This is in good agreement with the CFU data (**Figure 5A**). Ratio plot and 4C-like analysis also revealed  
365 important changes in the distribution of short and mid-range contacts outside of the *terminus* region  
366 when both Topo IV and Topo III are inactivated. When plotting the ratio map between the *parE<sup>ts</sup> topB*  
367 matrix and *topB* or *parE<sup>ts</sup>* matrices we characterized the contribution of Topo III and Topo IV. Butterfly  
368 wings, and mid-range contacts appeared in the *parE<sup>ts</sup> topB* compared to *topB* matrices (**Supplementary**  
369 **Figure 4B-D**). On the other hand, comparing the *parE<sup>ts</sup> topB* matrix with *parE<sup>ts</sup>* highlighted mostly an  
370 increase in short-range contacts (**Figure 5D**). The overexpression of Topo III rescued the viability of the  
371 *parE<sup>ts</sup>* strain at non-permissive temperatures (Nurse et al., 2003, **Figure 5A**). The Hi-C contact map of  
372 a *parE<sup>ts</sup>* strain overexpressing Topo III at non-permissive temperature displayed a reduction in short-  
373 range contacts along the diagonal, but little changes regarding butterfly wings and mid-range contacts  
374 (**Figure 5E and F and Supplementary Figure 4C and 4D**). These observations demonstrate that short-  
375 range contacts are mediated by a topological structure that can be removed by Topo III, most likely  
376 precatenanes with single strand regions near the replication fork. Since butterfly wings, mid-range  
377 contact and terminus insulation are not suppressed by Topo III overexpression, they appear as a direct  
378 consequences of Topo IV inactivation and might therefore reflect the catenation of fully replicated  
379 molecules, a substrate impossible to unlink for Topo III (**Figure 5G**).

### 380 **The position of butterfly wings is determined by MatP/*matS*, the Ter macrodomain organizer.**

381 The peculiar positioning of the butterfly wings at the edges of the Ter macrodomain (**Figure 3A**)  
382 prompted us to assess the influence of MatP on these structures. In the absence of MatP and at *parE<sup>ts</sup>*  
383 non-permissive temperature, the butterfly wings were replaced by a large region displaying increased  
384 long-range contacts (up to Mb distances), covering the entire *terminus* macrodomain (**Figure 6A**). The  
385 ratio plot of *matP parE<sup>ts</sup>* and *matP* contact maps further show an enrichment in mid-range contacts  
386 within the *terminus* macrodomain in absence of MatP (**Supplementary Figure 5A-D**). This observation  
387 confirms that the features revealed by Topo IV inactivation are structurally connected, with MatP being  
388 responsible for the positioning of the discrete boundaries limiting the entry of putative precatenation  
389 links into the *terminus* macrodomain. These borders define the characteristic butterfly structure and  
390 favors the emergence of the terminus pattern.

391

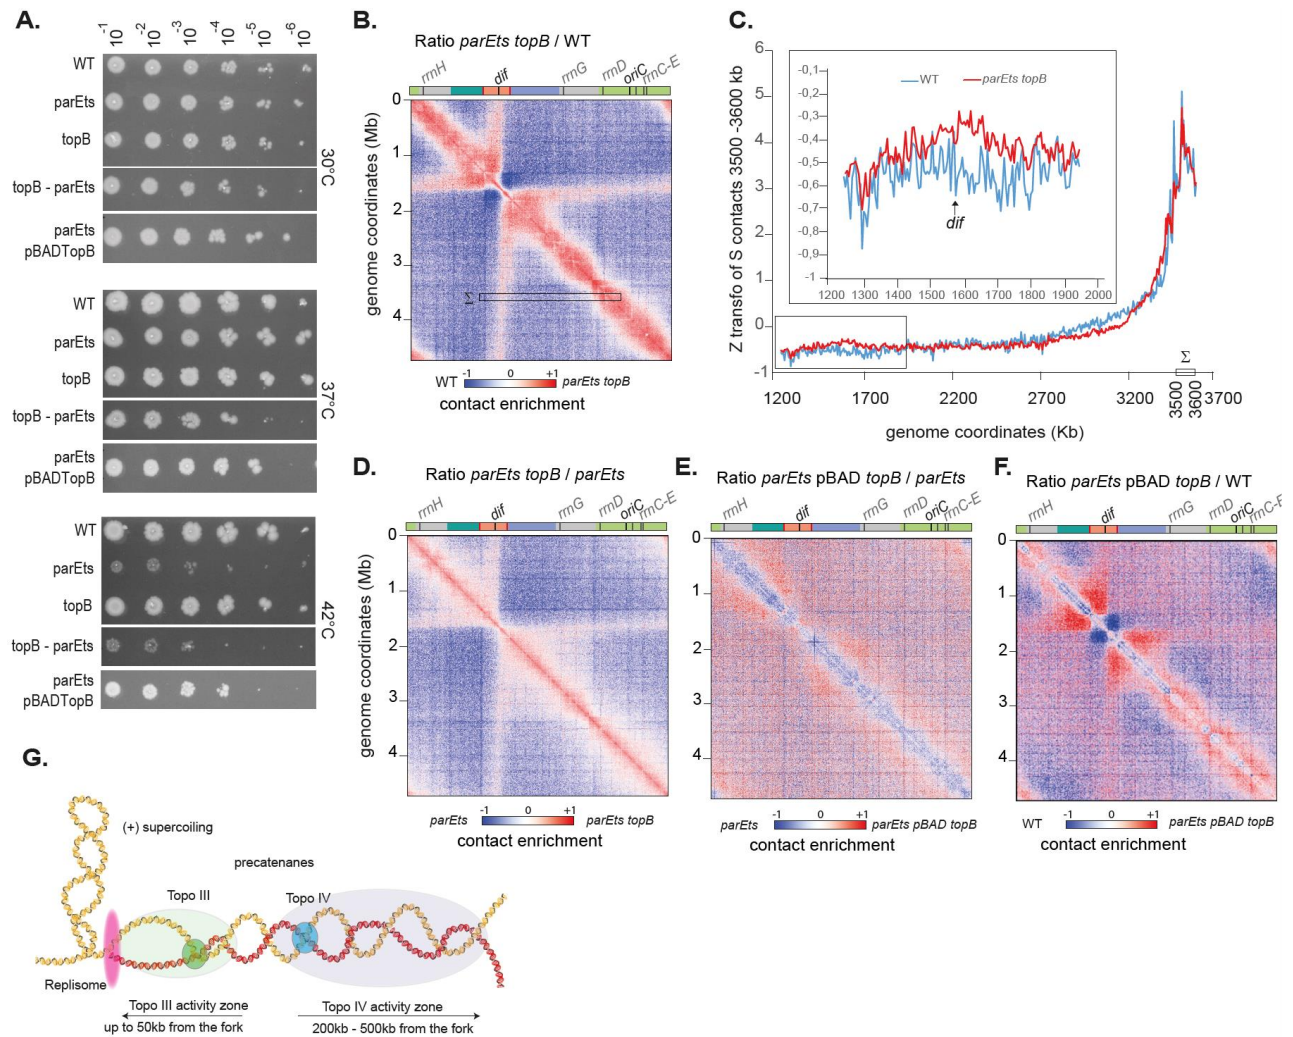

392

393 **Figure 5: Topo III activity partially rescues Topo IV deficiencies on chromosome conformation**

394 (A) Viability assay performed by droplet CFU of the WT, *parE<sup>ts</sup>*, *parE<sup>ts</sup> topB*, *topB*, and *parE<sup>ts</sup> pBAD topB*  
 395 at 30°C, 37°C and 42°C. (B) Ratio of normalized contacts map binned at 5kb of for the *parE<sup>ts</sup> topB* vs WT  
 396 matrix. Macrod domains and interesting positions of the genome are indicated above the plot. The y axis  
 397 indicates the genomic coordinates. A decrease or increase in contacts in the mutant cells compared  
 398 with the control is represented with a blue or red colour, respectively. White indicates no differences  
 399 between the two conditions. (C) Z transformation of the contacts made by a 100 Kb region located  
 400 between the coordinates 3500 Kb and 3600 Kb (marked  $\Sigma$  in B) with the left replicore (coordinates  
 401 1250 - 3700 Kb). WT and *parE<sup>ts</sup> topB* normalized matrix were analyzed. Inset, zoom on the terminal  
 402 part of the genome. (D) Ratio of normalized contacts map binned at 5kb of for the *parE<sup>ts</sup> topB* vs *parE<sup>ts</sup>*.  
 403 (E) *parE<sup>ts</sup> pBAD topB* vs WT. (F) *parE<sup>ts</sup> pBAD topB* vs *parE<sup>ts</sup>*. (G) Graphic representation of the  
 404 decatenation activity zone of Topo IV (blue) and Topo III (green) after the replication fork (pink). Sister  
 405 chromatids are represented by double helices in red (sister A) and yellow (sister B). Topo III is able to  
 406 act directly behind the replication fork at a 50kb resolution. Precatenanes beyond the Topo III  
 407 decatenation activity zone, are dealt with by Topo IV which can act between 200kb and 500kb away  
 408 from the replication fork.

409



410 Based on these observations, we hypothesized that displacing the terminus macrodomain should  
411 reorganize the Topo IV-dependent structural features. We used bacteriophage  $\lambda$  site specific  
412 recombination to generate an inversion that moved the region associated with the base of the right  
413 butterfly wing (coordinate: 1. 342 702 Mb) to a region now 540 Kb upstream the right replichore  
414 (coordinate 0. 806 549Mb) (Esnault et al., 2007) (**Figure 6B, Supplementary Figure 5E and F**). This  
415 inversion resulted in the repositioning of five *matS* sites (*matS* 1-5) to a region upstream within the  
416 right replichore, which in turn resulted in the generation of a large chromosomal region (coordinates  
417 0.8Mb to 1.3 Mb) devoid of *matS* sites and flanked by two *matS* regions. We observed a shift in the  
418 position of the right butterfly wing that coincided with the new position of the inverted *matS* sites. The  
419 butterfly wing was less precise, and long-range contacts appeared to extend from *matS5* to *dif*. The  
420 positioning and strength of the second butterfly signal was not affected by the inversion, suggesting  
421 that the two butterfly wings are not functionally interlinked (**Figure 6B, Supplementary Figure 5E and**  
422 **F**).

423 To test whether the butterfly structure is dynamic, we used an inducible *matP* gene and followed the  
424 formation of structures in the *terminus* region of the chromosome. After Topo IV inactivation in the  
425 absence of MatP, we induced the *matP* gene using arabinose. Thirty min of induction was sufficient to  
426 observe the reestablishment of the *terminus* pattern and preliminary butterfly wings (**Figure 6C,**  
427 **Supplementary Figure 5G and H**). These observations suggest that *parE<sup>ts</sup>* characteristic Hi-C signals  
428 correspond to dynamic structures, that can redistribute upon MatP binding to *matS*.

#### 429 **MukB controls the shape of the butterfly wings**

430 The presence of MatP in the *terminus* macrodomain inhibits MukB activity in *WT* cells (Nolivos et al.,  
431 2016). In the absence of MatP, MukB is able to access the terminus region and has been shown to both  
432 accelerate the segregation of *terminus* loci (Nolivos et al., 2016) and change *terminus* conformation  
433 (Lioy et al., 2018). MukB also interacts with Topo IV and modulate its activity (Hayama and Mariani,  
434 2010; Li et al., 2010). We therefore tested whether MukB affects the patterns observed when Topo IV  
435 is inactive. A *mukB* deletion in itself did not create butterfly pattern (Lioy et al., 2018), suggesting that  
436 disrupting the ParC-MukB interaction does not alter Topo IV activity in the same way as *parE* or *parC*  
437 inactivation does. When combined with *parE<sup>ts</sup>*, the *mukB* mutation did not abolish the formation of  
438 butterfly wings (**Figure 6D**). However, their characteristics in the double mutant differ from those in  
439 the single *parE<sup>ts</sup>* mutant. Comparison of the *parE<sup>ts</sup> mukB* mutant with the single *parE<sup>ts</sup>* mutant revealed  
440 that the basal portion of the butterfly wings were reinforced in the absence of *mukB* (i.e. higher  
441 frequency of contacts) and their length is reduced (**Supplementary Figure 5I**). In addition, we observed  
442 an increase of contacts between all regions within the butterfly, so that they now resemble a

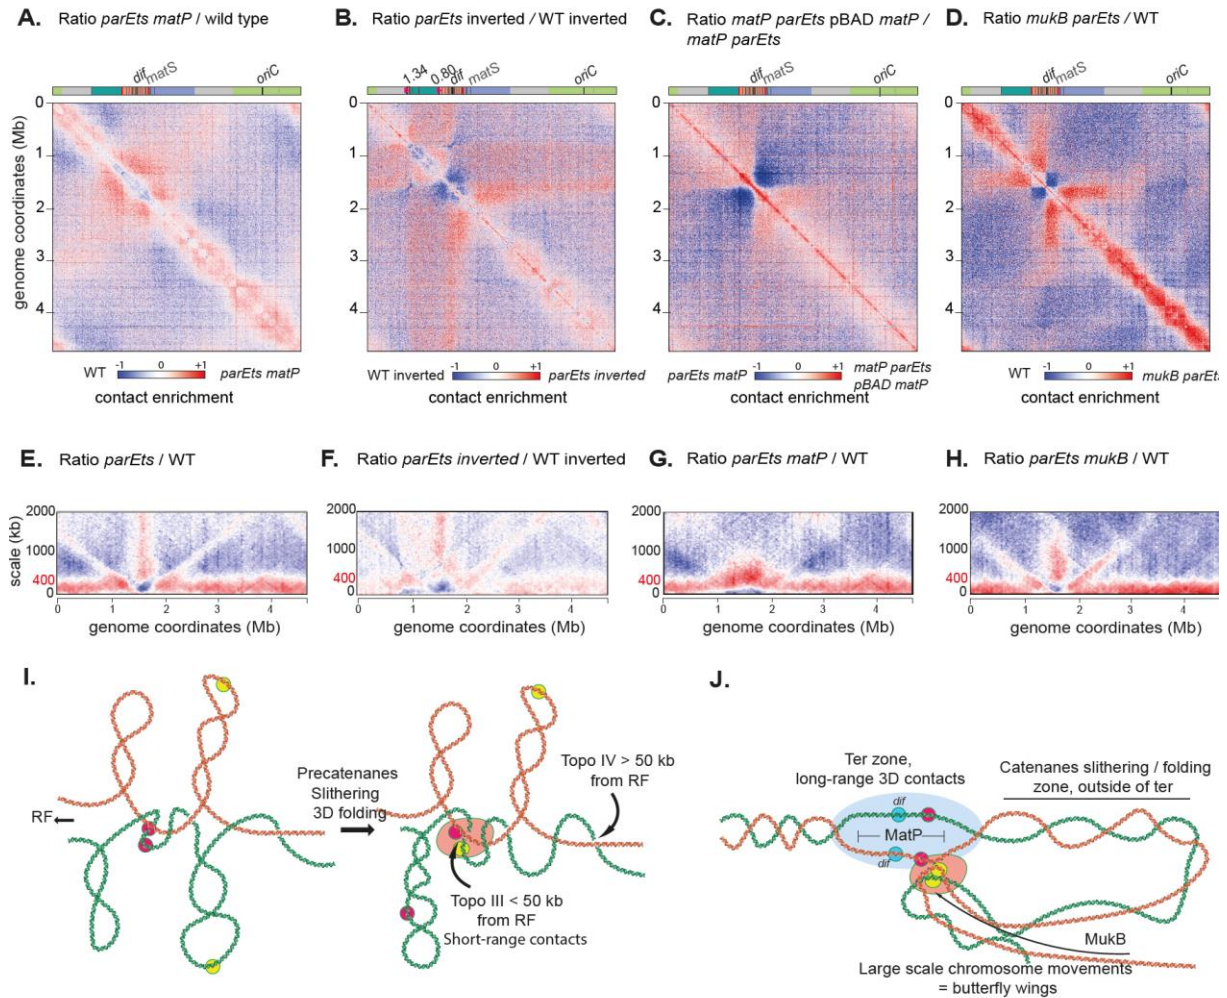

443

444 **Figure 6: The butterfly position is determined by MatP/matS, the terminus macrodomain organizer**  
 445 **and the bacterial SMC MukB.**

446 Ratio of normalized contacts map binned at 5kb, of (A) *parEts matP* vs WT, (B) *parEts inverted* vs WT  
 447 *inverted*. The inversion was performed via the *attR-attL* system and inverted the region between 0.8Mb  
 448 and 1.30Mb resulting in the displacement of *matS* sites. (C) *parEts matP pBAD matP* vs *parEts matP*, (D)  
 449 *parEts mukB* vs WT. Scalogram ratio of normalized contact map comparing two conditions for each 10-  
 450 kb bin along the chromosome: (E) *parEts* vs WT, (F) *parEts inverted* vs WT inverted and (G) *parEts matP*  
 451 vs WT, (H) *parEts mukB* vs WT. Macrodomains and interesting positions of the genome are indicated  
 452 above the plot. The y axis indicates the genomic coordinates. A decrease or increase in contacts in the  
 453 mutant cells compared with the control is represented with a blue or red colour, respectively. White  
 454 indicates no differences between the two conditions. (I) Graphic representation of putative sister  
 455 chromatid precatenanes organization, dynamics and homeostasis based on Hi-C data of Topo IV and  
 456 Topo III mutants. Two pairs of sister loci were represented in pink and yellow respectively. RF stands for  
 457 replication forks. J) Graphic representation of the terminus region and the chromosome folding events  
 458 that take place around it when decatenation is impaired. This region may function as a hub where  
 459 unresolved entanglements of the two sisters formed during chromosome replication enter by a yet  
 460 unknown mechanism to be separated by Topo IV. The low decatenation capacity in the *parEts* and *parCts*  
 461 strains increase the persistence/recurrence of these events and their detection with Hi-C and imaging.  
 462 MukB defines the maximum distance of loci able to contact the decatenation hub.

463

464 self-interacting domain, rather than a stripe (**Figure 6D**). Scalograms, i.e. the aggregation of contacts  
465 over various scales from each bin (Lioy et al. 2018), clearly show the variations in wing shapes and sizes  
466 in the mutant strains (*parE<sup>ts</sup>*, *parE<sup>ts</sup> inverted*, *parE<sup>ts</sup> mukB* and *parE<sup>ts</sup> matP*) (**Figure 6E-H**). In the *parE<sup>ts</sup>*  
467 strain, butterfly wings extend from the terminus to the origin of the chromosome. In the absence of  
468 MatP or in the inverted strain, they nearly disappear. In addition, MatP prevents the formation of mid-  
469 range contacts in the terminus region (**Figure 6F**). Finally, in the absence of MukB the butterfly wings  
470 abruptly stop ~1 Mb from *dif* on both replichores. The absence of MukB results in the exclusion of the  
471 *oriC* region from the butterfly structure. The increase in short range contacts detected along  
472 chromosome arms when Topo IV is inactivated (presumably corresponding to the accumulation of  
473 precatenanes) did not change in the absence of *matP* or *mukB*. This suggests that Topo IV partners do  
474 not significantly impact precatenanes dynamics. Therefore, MatP is involved in the positioning of the  
475 butterfly pattern, while MukB determines the wing length and contact density (**Figure 6H**). Moreover,  
476 MatP itself and/or the resulting MukB relocalization might prevents the progression of precatenanes  
477 into the terminus (**Figure 6F**).

478

## 479 **Discussion**

### 480 **Alteration of each Topoisomerase induces specific chromosome conformations**

481 Although DNA topology plays an important role in bacterial chromosome folding and compaction, the  
482 consequence of topoisomerase alteration on these processes are not yet fully understood. We took  
483 the advantage of Hi-C protocol improvements in bacteria to analyze chromosome conformation upon  
484 alteration of each of the four Topoisomerase of *E. coli*. Inhibition of Gyrase activity results in a strong  
485 reduction of short-range contacts over the entire genome. This agrees with previous report (Le et al.,  
486 2013) and confirms that supercoiling homeostasis is an important driver of CID organization in bacterial  
487 genomes. Surprisingly, because they have opposite catalytic activities, Topo I inhibition also reduces  
488 short-range contacts. Topo III and Topo IV inhibitions have the opposite effects, as they both increase  
489 short-range contacts: lightly and homogeneously for Topo III, but much more significantly and with a  
490 robust patterning for Topo IV. We investigated in details the nature and determinants of this  
491 patterning.

492

### 493 **New chromosome contacts emerging from Topo IV inhibition are intermolecular contacts**

494 Topo IV inhibition induces an increase of chromosome contacts in the 50 – 200 kb range chromosome  
495 arms with the exception of a large terminus region that behaves differently. We observed that these

496 new contacts are only established in replicating cells carrying circular chromosomes. Moreover, the  
497 activity of Topo III, which appears at very short range (0 – 50 kb), limits their amount. Altogether, these  
498 results demonstrate that short – mid range contacts detected when Topo IV is inactivated are  
499 produced by precatenanes (**Figure 6I**). Their amplitude, 200-300 kb, can only be explained if catenated  
500 sister chromatids slides or fold in 3D on top of each other on a 200-300 kb window. By contrast, Topo  
501 III only modulated short scale contacts, which agrees with the idea that soon after replication sister  
502 loci are well aligned (no more than 50kb offset). In the absence of Topo IV some of these precatenane  
503 links persist away from the replication fork, out of reach of Topo III action even when overexpressed.  
504 Therefore, a few tens of second after their replication, catenane links cannot reach the Topo III activity  
505 zone, and might be entrapped by topological barriers (**Figure 6I**). The comparison of wild-type  
506 replicating and non-replicating cells (**Figure 4B**) confirms that during a regular cell cycle Topo IV and  
507 Topo III sporadically let few catenation links all over the genome that will contribute to sister chromatid  
508 cohesion (Joshi et al., 2013; Lesterlin et al., 2012). Future Hi-C and sisterC (Oomen et al., 2020)  
509 experiments performed on cells with synchronized cell cycle should give important insights on the  
510 nature of these inter-sister contacts and their molecular determinants.

#### 511 **Very long-range contacts emerged as a butterfly pattern at the terminus**

512 The butterfly pattern observed in the absence of Topo IV is an atypical Hi-C feature; Butterfly wings  
513 involve contact between the *dif* area (200 kb surrounding *dif*) and the rest of the chromosome. These  
514 contacts don't follow genomic distance law and are not impacted by cis barriers (**Figure 3**). The density  
515 of contacts inside butterfly wings is dependent on the topological status of the cell (Topo III effect) and  
516 on MukB and their position determined by MatP/*matS* (**Figure 6**). We propose that the butterfly  
517 pattern is the signature of a failing decatenation hub (**Figure 6J**). *dif* is the major Topo IV activity site  
518 during regular cell cycle, this suggests that a large number of catenation links are removed at this locus  
519 (El Sayyed et al., 2016; Hojgaard et al., 1999). By contrast, the rest of the terminus region presents few  
520 Topo IV activity sites, but two prominent Topo IV binding sites at 1.2 and 2.8 Mb (El Sayyed et al.,  
521 2016). The positions of these binding sites corresponds to the border of the butterfly wing bases.  
522 Butterfly wings correspond to 3D contacts between the *dif* area and the rest of the chromosome.  
523 However, contacts between distal butterfly wings' regions were not enhanced (**Figure 3**). Since  
524 butterfly wings were more robust when Topo III was inhibited and less robust when Topo III was  
525 overexpressed, we postulate that they correspond to contacts between catenation links scattered over  
526 the chromosome arms and the *dif* area (**Figure 6J**). Imaging confirmed the possibility of such contacts  
527 between the *ori* and *terminus* region in a small portion of the cells in a population, respectively 8% in  
528 *parE<sup>ts</sup>* and 2% in *wt* cells (**Figure 3**). Several mechanisms might drive these contacts. One possibility is  
529 that protein marking catenation links is involved in protein-protein contacts between *dif* and other

530 regions of the chromosome. A DNA binding protein marking positive supercoils, GapR, has been  
531 identified in *C. crescentus* (Guo et al., 2018). A yet unknown equivalent of GapR for catenation links  
532 (catenation crossing are topologically similar to positive supercoils) might exist in *E. coli*. Future  
533 experiments will be require to test if YejK which interacts with Topo IV and binds DNA (Lee and  
534 Marians, 2013) or another catenane binding factor, could play such a role. Another possible  
535 explanation is that regions of the chromosome presenting excess of catenation links are excluded from  
536 the bulk of the genome and are then available to interact with the decatenation hub in the terminus.  
537 Since the absence of MukB changes butterfly wing density, one hypothesis is that catenane links  
538 cannot be extruded as plectonemic loops. Successive unsuccessful contacts between a crippled  
539 decatenation hub in the terminus area and links dispersed on the genome might create the butterfly  
540 pattern (**Figure 6J**). The role of such contacts for chromosome segregation remains unknown, however  
541 the observation of duplicated *ori* foci close to the *terminus* foci and close to mid-cell in the *parC<sup>ts</sup>* strain  
542 (**Figure 3N**) suggest that this localization may promote decatenation perhaps by concentrating the few  
543 remaining active Topo IV in a hub like structure.

#### 544 **Chromosome conformation capture proposes a new read out of topological constraints**

545 Most of our knowledge on the control of topological homeostasis by topoisomerases comes from  
546 plasmid DNA topology analyses by 1D or 2D gel electrophoresis or electron or AFM microscopy  
547 (Cebrián et al., 2015). Recently, molecular genomics methods were implemented to map  
548 topoisomerase activities or binding on chromosome (McKie et al., 2020). Hi-C is a popular method to  
549 study chromosome conformation, and a derivative to track intersister contacts was recently designed  
550 in eukaryotes (Oomen et al., 2020). The use of *loxP* recombination to reveal proximity of sisters  
551 (Lesterlin et al., 2012) or their catenation (Mariezcurrera and Uhlmann, 2017) is also a powerful tool  
552 to decipher local chromosome topology, with a genome-wide *loxP* recombination based assay recently  
553 adapted to survey sister proximity in *V. cholera* (Espinosa et al., 2019). Our results suggest that Hi-C  
554 can also offer a read-out of topological constraints. Coupling all these approaches together, along with  
555 imaging, will refine our understanding of chromosome conformation dynamics during the bacteria cell  
556 cycle and particularly the contribution of inter-sister contacts.

557

## 558 **Methods**

559 **Strains:** The strains used for this study can be found in Supplementary table 1. All strains are derived  
560 from MG1655. All strains were grown in minimal media A (0.26M KH<sub>2</sub>PO<sub>4</sub>, 0.06M K<sub>2</sub>HPO<sub>4</sub>, 0.01M tri  
561 sodium citrate, 2mM MgSO<sub>4</sub>, 0.04M (NH<sub>4</sub>)<sub>2</sub>SO<sub>4</sub>) supplemented with 0.2% of casamino acids and 0.5%  
562 of glucose. All strains were grown at 30°C. The strain containing the thermosensitive allele of *gyrB*  
563 (*gyrB<sup>ts</sup>*) was then shifted at 42°C for 20min; the strain containing the thermosensitive allele of *parC*  
564 (*parC<sup>ts</sup>*) grown at 30°C which is already non-permissive temperature; and, the strain containing the  
565 thermosensitive allele of *parE* (*parE<sup>ts</sup>*) was shifted at 42°C for 60min at most. Time course of *parE<sup>ts</sup>* shift  
566 was performed by growing the cells at 30°C before performing a shift for 10, 20, 30, 40, 50 and 60 min.  
567 Strains containing the expression plasmid pBAD were cultivated with 0.2% arabinose to induce the  
568 expression of the gene under the control of the promoter pBAD. For the strain containing pBAD *topB*,  
569 the arabinose was present for the entire duration of the culture; for the strain containing pBAD *matP*,  
570 arabinose was added after 30min of shift to 42°C.

571 **Drugs and antibiotics:** Inhibition of Topo I was done with a 5min treatment with 50ng/μl of Topotecan  
572 (Subramanian et al., 1995). DL-Serine Hydroxymate (SHX, Sigma CAS Number 55779-32-3), an inhibitor  
573 of seryl-tRNA synthetase which triggers the stringent response and prevents new rounds of replication,  
574 was used at a 10mg/ml working concentration for 90min. The efficiency of the drug is checked by FACS.  
575 Rifampicin was used for 10min at a 100ng/μl working concentration to inhibit transcription.

576 **Fluorescence activated cell sorting analysis:** The number of nucleoid was monitored using BD fortessa  
577 cytometer with a 488 nm argon laser and 515–545 nm emission filter at a maximum of 5000 event per  
578 second. A minimum of 100 000 cells were analyzed per time point. Calibration was done with the  
579 samples of the stationary phase of the *WT* and *parEts* at 30°C. For all samples, approximately 10<sup>8</sup> cells  
580 were fixed in 70% EtOH, washed, marked with propidium iodide (2-20μg/ml), washed again, and  
581 resuspended in sterile 1× PBS pH 7.2 prior to analysis. FCSalyzer software  
582 (<https://sourceforge.net/projects/fcsalyzer/>) was used for data analysis.

583 **Hi-C libraries:** Hi-C libraries were generated as recently described in (Cockram et al., 2021). 30mL of  
584 culture was grown in Minimal Medium A supplemented with casaminoacids and glucose until  
585 OD<sub>600nm</sub> ~ 0.2. Protein-DNA interactions were cross-linked by the addition of 37% formaldehyde (3%  
586 final concentration) for 30 min at room temperature with gentle agitation. Crosslinking was quenched  
587 with 2.5 M glycine (0.4 M final concentration) for 20 min at room temperature with gentle agitation.  
588 Fixed cells were then collected by centrifugation (4000 x g, 10 min 4°C), washed once in 1x PBS and  
589 snap frozen on dry ice and stored at -80°C until use. To proceed to the digestion of the cells, pellets  
590 were thawed on ice and resuspended in 1.2mL of 1xTE + complete protease inhibitor (EDTA-free,

591 Roche). Cells were transferred to a VK05 tubes containing glass spreads, and then lysed with precellys  
592 (V750; 5x30s). Uncross linked proteins were then solubilized by incubating the lysed cells with 10% SDS  
593 (0.5% final) for 10min at room temperature. 1ml of lysed cells was then added to the digestion mix  
594 (3ml of dH<sub>2</sub>O, 0.5ml of 10x NEBuffer1, 0.5ml of 10% triton-X100, and 1000U HpaII) and incubated 3h  
595 at 37°C. Digested cells were pelleted by centrifugation and resuspended in 398µl of water before being  
596 added to the biotinylation mix (10X ligation buffer without ATP; dAGTtp 3.3mM; biotine-14-dCtp  
597 0.4mM; 50U klenow (NEB5U/µl)) and incubated 45min at 37°C with agitation. Ligation mix (10X ligation  
598 buffer without ATP; BSA 10mg/ml; ATP 100mM; 250U thermoFisher T4 DNA ligase) was then added to  
599 the biotinylated DNA and the mix was incubated 3h at room temperature with gentle agitation.  
600 Protein-DNA complexes were then reverse crosslinked by adding the 20 µl of EDTA 0.5M, 80µl of SDS  
601 10% and and 100 µl of proteinase K 20mg/ml and incubating at 65°C overnight. DNA extraction is made  
602 by phenol- chlorophorm and precipitation with ethanol. DNA is washed with 70% ethanol,  
603 resuspended in 130 µl of TE and then treated with 20mg/ml RNAse for 30min at 37°C. Samples were  
604 sonicated using a Covaris S220 instrument to obtain fragments between 300bp-500bp, then purified  
605 by AMPure XP beads. The Illumina process was performed according to manufacturer  
606 recommendation, with are 12 cycles of amplification. The size of the DNA fragment in the libraries are  
607 checked on TAE 1% agarose gel and subjected to paired-end sequencing on an Illumina sequencer  
608 (NextSeq500-550 – 75 cycles).

609 **Generation of contact maps:** Generation of contact maps was done with *E.coli* analysis pipeline  
610 developed by Axel Cournac ([https://github.com/axelcournac/EColi\\_analysis](https://github.com/axelcournac/EColi_analysis)). Briefly, reads recovered  
611 from the sequencing were aligned with bowtie2 on the reference *E. coli* genome (NC\_000913), the two  
612 ends were merged and the reads were filtered to have a mapping quality strictly > 30. Then each read  
613 was assigned to a HpaII restriction fragment (fragment attribution), more than 80% of the reads on  
614 average are conserved as informative reads. The contact matrices files are then generated, binned at  
615 2, 5 or 10kb and normalized through the sequential component normalization procedure (SCN  
616 (Cournac et al., 2012)).

617 **Ratio and Ratio plots:** In order to visualize the differences between two contact maps, their ratio is  
618 calculated as described in (Lioy et al., 2018). Briefly, contacts made in the mutant map are divided by  
619 the contacts made in the control map for each loci. Increase of decrease of contact in the mutant  
620 compared to the control will appear red or blue respectively and no changes will appear white. To  
621 visualize the contact signal at a smaller scale we use the ratio plot representation, as described by (Lioy  
622 et al., 2018). Briefly, the ratio-plots summarize the differences of contacts between two conditions  
623 made by each bin with its neighboring bins, regardless of their orientation. For each condition, the  
624 average contacts made by a bin along the genome with bins upstream and downstream at increasing

625 distances (from 5kb to 1000kb or to 2000kb, in 5kb increments), was computed The  
626  $\log_2(\text{ACmutant}/\text{ACwt})$  was then displayed as a heatmap.

627 **Viability assay:** For each strains, cells were serially diluted in LB (10<sup>-1</sup> to 10<sup>-8</sup>) and 1 $\mu$ l of each dilution  
628 is deposited on LB agar plates. Plates were incubated overnight at 30°C.

629 **DNA density analysis:** Cells were grown using the same conditions as Hi-C. 1ml of culture of a control  
630 sample at 30°C and a sample after a 60 min shift at 42°C for each strain were fixed every 20min (t0-  
631 t60), using an equal volume of 1X PFA (37% paraformaldehyde + glutaraldehyde + 1X PBS). DAPI  
632 (0.5 $\mu$ g/ml) is added and the mixture is incubated 10min in the dark. Cells were then washed and  
633 deposited on microscopy slides containing a freshly made agarose pas (1X PBS + 1% agarose). Samples  
634 were observed with a Spinning disk (YokogaWa) W1 system on a Zeiss inverted confocal microscope  
635 with a 63x, phase objective. To avoid bleaching, each field of view was only observed in the phase  
636 contrast channel before acquisition. Using ImageJ, the density of DAPI fluorescence in each nucleoid  
637 was calculated as a proxy for nucleoid density.

638 **Loci positioning analysis:** Cells were grown akin to Hi-C samples (above). 1ml of culture of a control at  
639 30°C and a sample after shift at 42°C for each strain, were fixed every 20min (t0-t60), using an equal  
640 volume of fixation medium (3.7% formaldehyde, 0,006 %glutaraldehyde, 1X PBS). Cells were pelleted  
641 and resuspended in 100 $\mu$ l of fresh Minimal medium A. Three drops of 2 $\mu$ l are deposited on glass slides  
642 containing a freshly made agarose pad (1X PBS + 1% agarose). Samples were observed with a Spinning  
643 disk (Yokogawa) W1 system mounted on a Zeiss inverted confocal microscope at 630-fold  
644 magnification. Using MicrobeJ (<https://www.microbej.com/>, (Ducret et al., 2016)), the position of *aidB*  
645 and *far* loci in the cell in each condition at t0, t20, t40 and t60 after shift are calculated. An average of  
646 600 cells were analyzed. Heat maps of the foci position are automatically generated by MicrobeJ. Two  
647 color localization was performed with *gusC parS pMT1* (ter) and *aidB parS P1* locus (ori) tags. Cells  
648 were grown at 25°C in Minimal medium A supplemented with casaminoacids and glucose until culture  
649 reached OD = 0.1 and then cells were shifted to 30°C for 1h. Cells were observed live on agarose pad  
650 on a thermo-controlled stage with a Zeiss inverted epifluorescence microscope equipped with led  
651 illumination. Localization of foci was recorded with the ObjectJ plugin of ImageJ  
652 <https://sils.fnwi.uva.nl/bcb/objectj/>. An average of 600 cells were analyzed.

### 653 **Acknowledgements**

654 We thank other members of the Espeli and Koszul groups, Sylvie Rimsky, Adrien Camus, Martial  
655 Marbouty, Théo Foutel Rodier for insightful discussions. Axel Cournac, Etienne Jean, Lyam Baudry,  
656 Vittore Scolari, Cyril Matthey Dorey, Remi Montagne for Computational analysis tips. We thank Ivan  
657 Matic, Arnaud Gutierrez and Wei Lin Su and Agnès Thierry for technical advices. We thank the CIRB



658 imaging facility. We thank Jean-Yves Bouet, Pat Higgins, Frédéric Boccard and Ken Mariani for strains  
659 and plasmids. This research was supported by funding from the European Research Council under the  
660 7th Framework Program (ERC Grant Agreement 771813 to R.K.) and ANR (HiResBac ANR-15-CE11-  
661 0023-03 to R.K. and O.E).

662

### 663 **Author contributions**

664 BC, CC, RK and OE designed research. BC, IBC and CC performed the experiments, BC, IBC, CC  
665 and OE analyzed the data. All authors interpreted the data. BC, CC, RK and OE wrote the manuscript.

666

### 667 **Declaration of interest**

668 The authors declare no competing interests.

669

### 670 **Data Availability**

671 Sample description and raw sequences are accessible on SRA database through the following  
672 accession number: PRJNA730396

673

674 **References**

- 675 Badrinarayanan, A., Reyes-Lamothe, R., Uphoff, S., Leake, M.C., and Sherratt, D.J. (2012). In vivo  
676 architecture and action of bacterial structural maintenance of chromosome proteins. *Science* *338*,  
677 528–531.
- 678 Banigan, E.J., van den Berg, A.A., Brandão, H.B., Marko, J.F., and Mirny, L.A. (2020). Chromosome  
679 organization by one-sided and two-sided loop extrusion. *ELife* *9*, e53558.
- 680 Baxter, J., Oliver, A.W., and Schalbetter, S.A. (2019). Are SMC Complexes Loop Extruding Factors?  
681 Linking Theory With Fact. *BioEssays* *41*, 1800182.
- 682 Böhm, K., Giacomelli, G., Schmidt, A., Imhof, A., Koszul, R., Marbouty, M., and Bramkamp, M. (2020).  
683 Chromosome organization by a conserved condensin-ParB system in the actinobacterium  
684 *Corynebacterium glutamicum*. *Nature Communications* *11*, 1485.
- 685 Carter, S.D., and Sjögren, C. (2012). The SMC complexes, DNA and chromosome topology: right or  
686 knot? *Critical Reviews in Biochemistry and Molecular Biology* *47*, 1–16.
- 687 Cebrián, J., Castán, A., Martínez, V., Kadomatsu-Hermosa, M.J., Parra, C., Fernández-Nestosa, M.J.,  
688 Schaerer, C., Hernández, P., Krimer, D.B., and Schwartzman, J.B. (2015). Direct Evidence for the  
689 Formation of Precatenanes during DNA Replication. *J. Biol. Chem.* *290*, 13725–13735.
- 690 Champoux, J.J. (2001). DNA topoisomerases: structure, function, and mechanism. *Annu Rev Biochem*  
691 *70*, 369–413.
- 692 Cockram, C., Thierry, A., Gorlas, A., Lestini, R., and Koszul, R. (2021). Euryarchaeal genomes are  
693 folded into SMC-dependent loops and domains, but lack transcription-mediated  
694 compartmentalization. *Mol Cell* *81*, 459-472.e10.
- 695 Cournac, A., Marie-Nelly, H., Marbouty, M., Koszul, R., and Mozziconacci, J. (2012). Normalization of  
696 a chromosomal contact map. *BMC Genomics* *13*, 436.
- 697 Cui, T., Moro-oka, N., Ohsumi, K., Kodama, K., Ohshima, T., Ogasawara, N., Mori, H., Wanner, B., Niki,  
698 H., and Horiuchi, T. (2007). *Escherichia coli* with a linear genome. *EMBO Rep* *8*, 181–187.
- 699 Dame, R.T., Rashid, F.-Z.M., and Grainger, D.C. (2020). Chromosome organization in bacteria:  
700 mechanistic insights into genome structure and function. *Nat Rev Genet* *21*, 227–242.

- 701 Deng, S., Stein, R.A., and Higgins, N.P. (2005). Organization of supercoil domains and their  
702 reorganization by transcription. *Mol Microbiol* 57, 1511–1521.
- 703 DiGate, R.J., and Marians, K.J. (1989). Molecular cloning and DNA sequence analysis of *Escherichia*  
704 *coli* topB, the gene encoding topoisomerase III. *J Biol Chem* 264, 17924–17930.
- 705 Ducret, A., Quardokus, E.M., and Brun, Y.V. (2016). MicrobeJ, a tool for high throughput bacterial cell  
706 detection and quantitative analysis. *Nature Microbiology* 1, 1–7.
- 707 El Sayyed, H., Le Chat, L., Lebailly, E., Vickridge, E., Pages, C., Cornet, F., Cosentino Lagomarsino, M.,  
708 and Espéli, O. (2016). Mapping Topoisomerase IV Binding and Activity Sites on the *E. coli* Genome.  
709 *PLoS Genet* 12.
- 710 Esnault, E., Valens, M., Espéli, O., and Boccard, F. (2007). Chromosome Structuring Limits Genome  
711 Plasticity in *Escherichia coli*. *PLoS Genet* 3, e226.
- 712 Espinosa, E., Paly, E., and Barre, F.-X. (2019). High-resolution whole-genome analysis of sister-  
713 chromatid cohesion. *BioRxiv* 2019.12.17.879379.
- 714 Ferullo, D.J., Cooper, D.L., Moore, H.R., and Lovett, S.T. (2009). Cell cycle synchronization of  
715 *Escherichia coli* using the stringent response, with fluorescence labeling assays for DNA content and  
716 replication. *Methods* 48, 8–13.
- 717 Ganji, M., Shaltiel, I.A., Bisht, S., Kim, E., Kalichava, A., Haering, C.H., and Dekker, C. (2018). Real-time  
718 imaging of DNA loop extrusion by condensin. *Science* 360, 102–105.
- 719 Grompone, G., Bidnenko, V., Ehrlich, S.D., and Michel, B. (2004). PriA Is Essential for Viability of the  
720 *Escherichia coli* Topoisomerase IV parE10(Ts) Mutant. *J Bacteriol* 186, 1197–1199.
- 721 Guo, M.S., Haakonsen, D.L., Zeng, W., Schumacher, M.A., and Laub, M.T. (2018). A bacterial  
722 chromosome structuring protein binds overtwisted DNA to stimulate type II topoisomerases and  
723 enable DNA replication. *Cell* 175, 583-597.e23.
- 724 Hayama, R., and Marians, K.J. (2010). Physical and functional interaction between the condensin  
725 MukB and the decatenase topoisomerase IV in *Escherichia coli*. *PNAS* 107, 18826–18831.
- 726 Hojgaard, A., Szerlong, H., Tabor, C., and Kuempel, P. (1999). Norfloxacin-induced DNA cleavage  
727 occurs at the dif resolvase locus in *Escherichia coli* and is the result of interaction with topoisomerase  
728 IV. *Mol Microbiol* 33, 1027–1036.

- 729 Joshi, M.C., Magnan, D., Montminy, T.P., Lies, M., Stepankiw, N., and Bates, D. (2013). Regulation of  
730 Sister Chromosome Cohesion by the Replication Fork Tracking Protein SeqA. *PLoS Genet* 9.
- 731 Kato, J., Nishimura, Y., Imamura, R., Niki, H., Hiraga, S., and Suzuki, H. (1990). New topoisomerase  
732 essential for chromosome segregation in *E. coli*. *Cell* 63, 393–404.
- 733 Kavenoff, R., and Bowen, B.C. (1976). Electron microscopy of membrane-free folded chromosomes  
734 from *Escherichia coli*. *Chromosoma* 59, 89–101.
- 735 Kumar, R., Nurse, P., Bahng, S., Lee, C.M., and Marians, K.J. (2017). The MukB-topoisomerase IV  
736 interaction is required for proper chromosome compaction. *J Biol Chem* 292, 16921–16932.
- 737 Le, T.B., and Laub, M.T. (2016). Transcription rate and transcript length drive formation of  
738 chromosomal interaction domain boundaries. *EMBO J.* 35, 1582–1595.
- 739 Le, T.B.K., Imakaev, M.V., Mirny, L.A., and Laub, M.T. (2013). High-resolution mapping of the spatial  
740 organization of a bacterial chromosome. *Science* 342, 731–734.
- 741 Lee, C., and Marians, K.J. (2013). Characterization of the Nucleoid-associated Protein YejK. *J Biol*  
742 *Chem* 288, 31503–31516.
- 743 Leng, F., Chen, B., and Dunlap, D.D. (2011). Dividing a supercoiled DNA molecule into two  
744 independent topological domains. *PNAS* 108, 19973–19978.
- 745 Lesterlin, C., Gigant, E., Boccard, F., and Espéli, O. (2012). Sister chromatid interactions in bacteria  
746 revealed by a site-specific recombination assay. *EMBO J* 31, 3468–3479.
- 747 Levine, C., Hiasa, H., and Marians, K.J. (1998). DNA gyrase and topoisomerase IV: biochemical  
748 activities, physiological roles during chromosome replication, and drug sensitivities. *Biochim Biophys*  
749 *Acta* 1400, 29–43.
- 750 Li, Y., Stewart, N.K., Berger, A.J., Vos, S., Schoeffler, A.J., Berger, J.M., Chait, B.T., and Oakley, M.G.  
751 (2010). *Escherichia coli* condensin MukB stimulates topoisomerase IV activity by a direct physical  
752 interaction. *PNAS* 107, 18832–18837.
- 753 Lieberman-Aiden, E., van Berkum, N.L., Williams, L., Imakaev, M., Ragoczy, T., Telling, A., Amit, I.,  
754 Lajoie, B.R., Sabo, P.J., Dorschner, M.O., et al. (2009). Comprehensive mapping of long-range  
755 interactions reveals folding principles of the human genome. *Science* 326, 289–293.

- 756 Lioy, V.S., Cournac, A., Marbouty, M., Duigou, S., Mozziconacci, J., Espéli, O., Boccard, F., and Koszul,  
757 R. (2018). Multiscale Structuring of the E. coli Chromosome by Nucleoid-Associated and Condensin  
758 Proteins. *Cell* 172, 771-783.e18.
- 759 Luttinger, A.L., Springer, A.L., and Schmid, M.B. (1991). A cluster of genes that affects nucleoid  
760 segregation in *Salmonella typhimurium*. *New Biol* 3, 687–697.
- 761 Mäkelä, J., and Sherratt, D.J. (2020). Organization of the *Escherichia coli* Chromosome by a MukBEF  
762 Axial Core. *Molecular Cell* 78, 250-260.e5.
- 763 Marbouty, M., Le Gall, A., Cattoni, D.I., Cournac, A., Koh, A., Fiche, J.-B., Mozziconacci, J., Murray, H.,  
764 Koszul, R., and Nollmann, M. (2015). Condensin- and Replication-Mediated Bacterial Chromosome  
765 Folding and Origin Condensation Revealed by Hi-C and Super-resolution Imaging. *Molecular Cell* 59,  
766 588–602.
- 767 Mariezcurrena, A., and Uhlmann, F. (2017). Observation of DNA intertwinings along authentic budding  
768 yeast chromosomes. *Genes Dev.* 31, 2151–2161.
- 769 Marko, J.F., De Los Rios, P., Barducci, A., and Gruber, S. (2019). DNA-segment-capture model for loop  
770 extrusion by structural maintenance of chromosome (SMC) protein complexes. *Nucleic Acids Res* 47,  
771 6956–6972.
- 772 McKie, S.J., Maxwell, A., and Neuman, K.C. (2020). Mapping DNA Topoisomerase Binding and  
773 Cleavage Genome Wide Using Next-Generation Sequencing Techniques. *Genes* 11, 92.
- 774 Mercier, R., Petit, M.-A., Schbath, S., Robin, S., El Karoui, M., Boccard, F., and Espéli, O. (2008). The  
775 MatP/matS site-specific system organizes the terminus region of the E. coli chromosome into a  
776 macrodomain. *Cell* 135, 475–485.
- 777 Nasmyth, K. (2001). Disseminating the genome: joining, resolving, and separating sister chromatids  
778 during mitosis and meiosis. *Annu. Rev. Genet.* 35, 673–745.
- 779 Nicolas, E., Upton, A.L., Uphoff, S., Henry, O., Badrinarayanan, A., and Sherratt, D. (2014). The SMC  
780 Complex MukBEF Recruits Topoisomerase IV to the Origin of Replication Region in Live *Escherichia*  
781 *coli*. *MBio* 5, e01001-13.
- 782 Nolivos, S., Upton, A.L., Badrinarayanan, A., Müller, J., Zawadzka, K., Wiktor, J., Gill, A., Arciszewska,  
783 L., Nicolas, E., and Sherratt, D. (2016). MatP regulates the coordinated action of topoisomerase IV  
784 and MukBEF in chromosome segregation. *Nat Commun* 7, 10466.

- 785 Oomen, M.E., Hedger, A.K., Watts, J.K., and Dekker, J. (2020). Detecting chromatin interactions along  
786 and between sister chromatids with SisterC (Genomics).
- 787 Orr, E., and Staudenbauer, W.L. (1981). An *Escherichia coli* mutant thermosensitive in the B subunit  
788 of DNA gyrase: Effect on the structure and replication of the colicin E1 plasmid in vitro. *Mol Gen*  
789 *Genet* 181, 52–56.
- 790 Peter, B.J., Arsuaga, J., Breier, A.M., Khodursky, A.B., Brown, P.O., and Cozzarelli, N.R. (2004).  
791 Genomic transcriptional response to loss of chromosomal supercoiling in *Escherichia coli*. *Genome*  
792 *Biology* 5, R87.
- 793 Postow, L. (2004). Topological domain structure of the *Escherichia coli* chromosome. *Genes &*  
794 *Development* 18, 1766–1779.
- 795 Ruiten, M.S. van, and Rowland, B.D. (2018). SMC Complexes: Universal DNA Looping Machines with  
796 Distinct Regulators. *Trends in Genetics* 34, 477–487.
- 797 Sawitzke, J.A., and Austin, S. (2000). Suppression of chromosome segregation defects of *Escherichia*  
798 *coli muk* mutants by mutations in topoisomerase I. *Proc Natl Acad Sci U S A* 97, 1671–1676.
- 799 Sharma, U.K., and Chatterji, D. (2010). Transcriptional switching in *Escherichia coli* during stress and  
800 starvation by modulation of sigma activity. *FEMS Microbiol Rev* 34, 646–657.
- 801 Sinden, R.R., and Pettijohn, D.E. (1981). Chromosomes in living *Escherichia coli* cells are segregated  
802 into domains of supercoiling. *Proc Natl Acad Sci U S A* 78, 224–228.
- 803 Springer, A.L., and Schimd, M.B. (1993). Molecular characterization of the *Salmonella typhimurium*  
804 *parE* gene. *Nucl Acids Res* 21, 1805–1809.
- 805 Staczek, P., and Higgins, N.P. (1998). Gyrase and Topo IV modulate chromosome domain size in vivo.  
806 *Mol Microbiol* 29, 1435–1448.
- 807 Stein, R.A., Deng, S., and Higgins, N.P. (2005). Measuring chromosome dynamics on different time  
808 scales using resolvases with varying half-lives: Detecting domains with time-restricted enzymes.  
809 *Molecular Microbiology* 56, 1049–1061.
- 810 Stracy, M., Ginda, K., Zawadzka, K., Lesterlin, C., Kapanidis, A.N., and Sherratt, D.J. (2015). The  
811 Localization and Action of Topoisomerase IV in *Escherichia coli* Chromosome Segregation Is  
812 Coordinated by the SMC Complex, MukBEF. *Cell Rep* 13, 2587–2596.

- 813 Subramanian, D., Kraut, E., Staubus, A., Young, D.C., and Muller, M.T. (1995). Analysis of  
814 topoisomerase I/DNA complexes in patients administered topotecan. *Cancer Res* 55, 2097–2103.
- 815 Val, M.-E., Marbouty, M., Martins, F. de L., Kennedy, S.P., Kemble, H., Bland, M.J., Possoz, C., Koszul,  
816 R., Skovgaard, O., and Mazel, D. (2016). A checkpoint control orchestrates the replication of the two  
817 chromosomes of *Vibrio cholerae*. *Science Advances* 2, e1501914.
- 818 Wang, X., Reyes-Lamothe, R., and Sherratt, D.J. (2008). Modulation of *Escherichia coli* sister  
819 chromosome cohesion by topoisomerase IV. *Genes Dev* 22, 2426–2433.
- 820 Wang, X., Le, T.B.K., Lajoie, B.R., Dekker, J., Laub, M.T., and Rudner, D.Z. (2015). Condensin promotes  
821 the juxtaposition of DNA flanking its loading site in *Bacillus subtilis*. *Genes Dev.* 29, 1661–1675.
- 822 Zechiedrich, E.L., Khodursky, A.B., and Cozzarelli, N.R. (1997). Topoisomerase IV, not gyrase,  
823 decatenates products of site-specific recombination in *Escherichia coli*. *Genes Dev* 11, 2580–2592.
- 824
